# Supplementary material for: The Genus Miconia Ruiz & Pav. (Melastomataceae): Ethnomedicinal Uses, Pharmacology, and Phytochemistry
Source: MDPI journal article supplement (doi:10.3390/molecules27134132), 2022-06-27
Supplement: s1 [file s1]

## Supplementary Material

**Table S1.** Compounds identified in the genus *Miconia* Ruiz & Pav. and their respective biological activities.

| Compounds                                                                                             | Structure | PubChem      | Species                                                                               | Plant Organ  | Biological Activity                      | References |
|-------------------------------------------------------------------------------------------------------|-----------|--------------|---------------------------------------------------------------------------------------|--------------|------------------------------------------|------------|
| <b>Alkaloids</b>                                                                                      |           |              |                                                                                       |              |                                          |            |
| Glycine betaine                                                                                       | 1         | CID 21872856 | <i>M. fallax</i><br><i>M. rufescens</i><br><i>M. stenostachya</i>                     | Aerial parts | -                                        | [60]       |
| Isomer of 5- carboxylyaloside                                                                         | 2         | -            | <i>M. latecrenata</i>                                                                 | Leaves       | Antiplasmodial                           | [16]       |
| Isomer of 5- carboxystrictosidin                                                                      | 3         | -            | <i>M. latecrenata</i>                                                                 | Leaves       | Antiplasmodial                           | [16]       |
| Isomer of cinnamoyl-4"-hydroxy-3"-methoxy-lyaloside                                                   | 4         | -            | <i>M. latecrenata</i>                                                                 | Leaves       | Antiplasmodial                           | [16]       |
| Isomer of lyaloside                                                                                   | 5         | CID 11092621 | <i>M. latecrenata</i>                                                                 | Leaves       | Antiplasmodial                           | [16]       |
| Lyalosidic acid                                                                                       | 6         | CID 10391678 | <i>M. latecrenata</i>                                                                 | Leaves       | Antiplasmodial                           | [16]       |
| Strictosidine                                                                                         | 7         | CID 161336   | <i>M. latecrenata</i>                                                                 | Leaves       | Antiplasmodial                           | [16]       |
| Strictosidinic acid                                                                                   | 8         | CID 21586927 | <i>M. latecrenata</i>                                                                 | Leaves       | Antiplasmodial                           | [16]       |
| <i>Trans</i> -4- hydroxy-methyl- <i>D</i> -proline                                                    | 9         | CID 12313446 | <i>M. dispar</i><br><i>M. fallax</i><br><i>M. rufescens</i><br><i>M. stenostachya</i> | Aerial parts | -                                        | [60]       |
| <b>Flavonoids</b>                                                                                     |           |              |                                                                                       |              |                                          |            |
| (-)-epicatechin                                                                                       | 10        | CID 72276    | <i>M. rubiginosa</i>                                                                  | Leaves       | -                                        | [61]       |
| 5,6,7-trihydroxy- 4'-methoxyflavone                                                                   | 11        | -            | <i>M. ferruginata</i>                                                                 | Leaves       | Insecticide                              | [26]       |
| 5,7,4'-trihydroxy-6,8-dimethoxyflavone                                                                | 12        | -            | <i>M. ferruginata</i>                                                                 | Leaves       | Insecticide                              | [26]       |
| 5-hydroxy-4',7-dimethoxyflavone-(6→6'') -5"-hydroxy-3''',4''',7'''-trimethoxyflavone                  | 13        | -            | <i>M. cabucu</i>                                                                      | Aerial parts | -                                        | [62]       |
| 5-Hydroxy-4',7-dimethoxy-8-methylflavone                                                              | 14        | CID 91213897 | <i>M. ferruginata</i>                                                                 | Leaves       | Insecticide                              | [26]       |
| Matteucinol 7-O-β-d-apiofuranosyl-(1→6)-β-d-glucopyranosyl                                            | 15        | CID 42607943 | <i>M. prasina</i>                                                                     | Stem         | -                                        | [63]       |
| Apigenin-7-O-glucoside                                                                                | 16        | CID 44257792 | <i>M. alypifolia</i>                                                                  | Leaves       | Antioxidant                              | [49]       |
| Astragalin                                                                                            | 17        | CID 5282102  | <i>M. albicans</i>                                                                    | Fruits       | Antioxidant and anti-inflammatory        | [13]       |
| Cyanidin-3- O-rutinoside                                                                              | 18        | CID 441674   | <i>M. albicans</i>                                                                    | Fruits       | Antioxidant and anti-inflammatory        | [13]       |
| Demethoxymatteucinol                                                                                  | 19        | CID 180550   | <i>M. prasina</i>                                                                     | Stem         | -                                        | [63]       |
| Farrerol                                                                                              | 20        | CID 91144    | <i>M. prasina</i>                                                                     | Stem         | -                                        | [63]       |
| Farrerol 7-O-β-D-apiofuranosyl(1→6)-β-D-glucopyranoside                                               | 21        | -            | <i>M. trailii</i>                                                                     | Aerial parts | -                                        | [64]       |
| Favanone glycoside 7-O-β-D-apiofuranosyl-(1→6)-β-D-glucopyranosyldemethoxymatteucinol (miconioside C) | 22        | -            | <i>M. prasina</i>                                                                     | Stem         | -                                        | [63]       |
| Hyperoside                                                                                            | 23        | CID 5281643  | <i>M. chamissois</i>                                                                  | Leaves       | Antimicrobial, cytotoxic and Antioxidant | [6]        |
| Isoquercitrin                                                                                         | 24        | CID 5280804  | <i>M. albicans</i>                                                                    | Leaves       | Anti-inflammatory                        | [32]       |
| Isorhamnetin                                                                                          | 25        | CID 5281654  | <i>M. latecrenata</i>                                                                 | Leaves       | Antibacterial                            | [22]       |
| Isovitexin                                                                                            | 26        | CID 162350   | <i>M. chamissois</i>                                                                  | Leaves       | Antimicrobial, cytotoxic and Antioxidant | [6]        |
| Kaempferol 3-O-α-L-arabinopyranoside                                                                  | 27        | CID: 5481882 | <i>M. albicans</i>                                                                    | Leaves       | Antidiabetic                             | [65]       |

|                                                                                 |    |               |                                                                 |                        |                                   |              |
|---------------------------------------------------------------------------------|----|---------------|-----------------------------------------------------------------|------------------------|-----------------------------------|--------------|
| Kaempferol                                                                      | 28 | CID 5280863   | <i>M. albicans</i>                                              | Fruits                 | Antioxidant and anti-inflammatory | [13]         |
|                                                                                 |    |               | <i>M. burchellii.</i>                                           | Leaves                 | Cytotoxic                         | [55]         |
| Kaempferol-3-O-diglucoside                                                      | 29 | CID 21722032  | <i>M. alypifolia</i>                                            | Leaves                 | Antioxidant                       | [49]         |
| Kaempferol-3-O-D-galactoside                                                    | 30 | CID 5488283   | <i>M. alypifolia</i>                                            | Leaves                 | Antioxidant                       | [49]         |
| kaempferol-3-O-β -glucopyranoside                                               | 31 | -             | <i>M. burchellii.</i>                                           | Leaves                 | Cytotoxic                         | [55]         |
| Kaempferol-3-O-β-D-(6"-coumaroyl)-glucopyranoside                               | 32 | -             | <i>M. cabucu</i>                                                | Aerial parts           | -                                 | [62]         |
|                                                                                 |    |               | <i>M. rubiginosa</i>                                            |                        | -                                 | [61]         |
| Kaempferol-3-O-β-galactopyranoside                                              | 33 | -             | <i>M. burchellii.</i>                                           | Leaves                 | Cytotoxic                         | [55]         |
| Kaempferol-O-pentoside                                                          | 34 | CID 14749097  | <i>M. albicans</i>                                              | Leaves                 | Anti-inflammatory                 | [32]         |
| Leucoanthocyanidin                                                              | 35 | CID 124037363 | <i>M. albicans</i>                                              | Leaves                 | Anti-inflammatory                 | [12]         |
| Matteucinol 7-O-α-L-arabinopyranosyl(1→6)-β-D-glucopyranoside – (Miconioside A) | 36 | CID 11050315  | <i>M. trailii</i>                                               | Aerial parts           | -                                 | [64]         |
| Matteucinol 7-O-β-apiofuranosyl (1 → 6)-β-glucopyranoside                       | 37 | CID 42607943  | <i>M. albicans</i><br><i>M. chamissois</i><br><i>M. trailli</i> | Aerial parts           | -                                 | [64,66]      |
|                                                                                 |    | CID 160490    | <i>M. trailii</i>                                               | Aerial parts           | -                                 | [64]         |
| Matteucinol                                                                     | 38 |               | <i>M. prasina</i>                                               | Stem                   |                                   | [63]         |
|                                                                                 |    |               | <i>M. chamissois</i>                                            | Leaves                 | Angiogenic                        | [54]         |
| Mattucinol-7-O-[4' ',6' '-di-O-galloyl]-β-D-glucopyranoside                     | 39 | CID 42607945  | <i>M. myriantha</i>                                             | Aerial parts           | -                                 | [67]         |
| Mattucinol-7-O-[4' ',6' '-O-(S)-hexahydroxydiphenoyl]-β-D-glucopyranoside       | 40 | -             | <i>M. myriantha</i>                                             | Aerial parts           | -                                 | [67]         |
| Mattucinol-7-O-β-D-glucopyranoside                                              | 41 | -             | <i>M. myriantha</i>                                             | Aerial parts           | -                                 | [67]         |
| Mearnsetin 3-O-α-L-rhamnopyranoside                                             | 42 | -             | <i>M. albicans</i>                                              | Leaves                 | Antidiabetic                      | [65]         |
| Miconioside B                                                                   | 43 | CID 42607900  | <i>M. albicans</i><br><i>M. chamissois</i><br><i>M. prasina</i> | Leaves<br>Stem         | -                                 | [66]<br>[63] |
| Myricetin 3-galactoside                                                         | 44 | CID 5491408   | <i>M. albicans</i>                                              | Fruits                 | Antioxidant and anti-inflammatory | [13]         |
| Myricetin-3-O- α-L-rhamnopyranoside                                             | 45 | -             | <i>M. cabucu</i><br><i>M. albicans</i>                          | Aerial parts<br>Leaves | -<br>Antidiabetic                 | [62]<br>[65] |
| Myricetin-O-hexoside                                                            | 46 | CID 12311099  | <i>M. albicans</i>                                              | Leaves                 | Anti-inflammatory                 | [32]         |
| Quercetin 3-O-(2"-galloyl)-α-L-rhamnopyranoside                                 | 47 | CID 44259259  | <i>M. albicans</i>                                              | Leaves                 | Antidiabetic                      | [65]         |
| Quercetin glycocoumarate                                                        | 48 | -             | <i>M. albicans</i>                                              | Fruits                 | Antioxidant and anti-inflammatory | [13]         |
| Quercetin glycogallate                                                          | 49 | -             | <i>M. albicans</i>                                              | Fruits                 | Antioxidant and anti-inflammatory | [13]         |
|                                                                                 |    |               | <i>M. chamissois</i>                                            |                        | -                                 | [66]         |
|                                                                                 |    |               |                                                                 | Leaves                 | Antioxidant                       | [51]         |
| Quercetin                                                                       | 50 | CID 5280343   | <i>M. albicans</i>                                              |                        | Anti-inflammatory                 | [12]<br>[32] |
|                                                                                 |    |               |                                                                 | Fruits                 | Antioxidant and anti-inflammatory | [13]         |
|                                                                                 |    |               | <i>M. latecrenata</i>                                           | Leaves                 | Antibacterial<br>Antimutagênica   | [16]<br>[16] |
| Quercetin-3-O- α -L-rhamnopyranoside                                            | 51 | -             | <i>M. cabucu</i>                                                | Aerial parts           | -                                 | [62]         |

|                                                                                            |    |               |                       |              |                                              |      |
|--------------------------------------------------------------------------------------------|----|---------------|-----------------------|--------------|----------------------------------------------|------|
| Quercetin-3-O- $\beta$ -D-glucopyranoside                                                  | 52 | -             | <i>M. cabucu</i>      | Aerial parts | -                                            | [62] |
| Quercetin-3-O-arabinoside                                                                  | 53 | CID 12309865  | <i>M. albicans</i>    | Fruits       | Antioxidant and anti-inflammatory            | [13] |
| Quercetin-3-O-galactoside                                                                  | 54 | -             | <i>M. alypifolia</i>  | Leaves       | Antioxidant                                  | [49] |
|                                                                                            |    |               | <i>M. albicans</i>    | Fruits       | Antioxidant and anti-inflammatory            | [13] |
| Quercetin-3-O-glucoside                                                                    | 55 | CID 25203368  | <i>M. albicans</i>    | Leaves       | Antioxidant                                  | [51] |
| Quercetin-3-O-rhamnoside                                                                   | 56 | CID 5353915   | <i>M. latecrenata</i> | Leaves       | Antibacterial                                | [47] |
| Quercetin-3-O- $\alpha$ -D-arabinopyranoside                                               | 57 | CID 44259270  | <i>M. rubiginosa</i>  | Leaves       | -                                            | [61] |
| Quercetin-3-O- $\alpha$ -L-rhamnopyranoside                                                | 58 | CID 6325794   | <i>M. rubiginosa</i>  | Leaves       | -                                            | [61] |
| Quercetin-3-O- $\alpha$ -rhamnopyranosil-(1 $\rightarrow$ 4)-O- $\beta$ -galactopyranoside | 59 | -             | <i>M. rubiginosa</i>  | Leaves       | -                                            | [61] |
| Quercetin-3-O- $\beta$ -D-arabinofuranoside                                                | 60 | CID 12047348  | <i>M. rubiginosa</i>  | Leaves       | -                                            | [61] |
| Quercetin-3-O- $\beta$ -galactopyranoside                                                  | 61 | -             | <i>M. rubiginosa</i>  | Leaves       | -                                            | [61] |
| Quercetin-7-O-glucoside                                                                    | 62 | CID 5381351   | <i>M. albicans</i>    | Fruits       | Antioxidant and anti-inflammatory            | [13] |
| Quercetin-O-galloyl-hexoside                                                               | 63 | -             | <i>M. albicans</i>    | Leaves       | Anti-inflammatory                            | [32] |
| Quercetin-O-galloyl-pentoside                                                              | 64 | -             | <i>M. albicans</i>    | Leaves       | Anti-inflammatory                            | [32] |
| Quercetin-O-pentoside                                                                      | 65 | -             | <i>M. albicans</i>    | Leaves       | Anti-inflammatory                            | [32] |
| Quercitrin                                                                                 | 66 | CID 5280459   | <i>M. latecrenata</i> | Leaves       | Antiplasmodial                               | [16] |
|                                                                                            |    |               | <i>M. albicans</i>    | Fruits       | Antioxidant and anti-inflammatory            | [13] |
|                                                                                            |    |               |                       |              | -                                            | [66] |
| Rutin                                                                                      | 67 | CID 5280805   | <i>M. chamissois</i>  |              | Antioxidant                                  | [51] |
|                                                                                            |    |               |                       | Leaves       | anti-inflammatory                            | [12] |
|                                                                                            |    |               | <i>M. albicans</i>    |              |                                              | [32] |
|                                                                                            |    |               |                       | Fruits       | Antioxidant and anti-inflammatory            | [13] |
|                                                                                            |    |               | <i>M. chamissois</i>  | Leaves       | Antimicrobial, cytotoxic and Antioxidant     | [6]  |
| Vitexin                                                                                    | 68 | CID 5280441   | <i>M. chamissois</i>  | Leaves       | Antimicrobial, cytotoxic and Antioxidant     | [6]  |
| <b>Phenolics</b>                                                                           |    |               |                       |              |                                              |      |
| 1,2,3,5-tetra-galloyl 1-4,6-HHDPglucose                                                    | 69 | -             | <i>M. latecrenata</i> | Leaves       | Antioxidant, antibacterial and antimutagenic | [16] |
| 1-galloyl-2,3; 4,6-bis-HHDPglucose isomer                                                  | 70 | -             | <i>M. latecrenata</i> | Leaves       | Antiplasmodial                               | [16] |
|                                                                                            |    |               |                       |              | Antibacterial                                | [47] |
| 1-O-(E)-caffeoyl-4,6-di-O-galloyl- $\beta$ -D-glucopyranose                                | 71 | -             | <i>M. albicans</i>    | Leaves       | Antioxidant                                  | [16] |
|                                                                                            |    |               |                       |              | Antimutagenic                                | [16] |
| 2-Cinnamoyl-1-galloyl-1- $\beta$ -Dglucopyranose                                           | 72 | CID 131752569 | <i>M. albicans</i>    | Fruits       | Antioxidant and anti-inflammatory            | [13] |
| 2,3; 4,6-bis-HHDP-glucose isomer                                                           | 73 | -             | <i>M. latecrenata</i> | Leaves       | Antibacterial                                | [47] |
|                                                                                            |    |               |                       |              | Antioxidant and antimutagenic                | [16] |

|                                                              |    |             |                       |              |                                              |      |
|--------------------------------------------------------------|----|-------------|-----------------------|--------------|----------------------------------------------|------|
|                                                              |    |             |                       |              | Antiplasmodial                               | [16] |
| 3,3'-di-O-methyl ellagic acid-4-O- $\beta$ -D-xylopyranoside | 74 | -           | <i>M. myriantha</i>   | Aerial parts | -                                            | [67] |
| 3,3',4-Tri-O-methylellagic acid                              | 75 | -           | <i>M. albicans</i>    | Fruits       | Antioxidant and anti-inflammatory            | [13] |
| 3,3'-di-O-methyl elagic acid                                 | 76 | CID 5488919 | <i>M. albicans</i>    | Fruits       | Antioxidant and anti-inflammatory            | [13] |
| 3,4-Dihydroxybenzoic acid                                    | 77 | CID 72      | <i>M. albicans</i>    | Fruits       | Antioxidant and anti-inflammatory            | [13] |
| 4-Hydroxybenzoate-O-glucoside                                | 78 | -           | <i>M. albicans</i>    | Fruits       | Antioxidant and anti-inflammatory            | [13] |
| 4-Hydroxybenzoic acid                                        | 79 | CID 135     | <i>M. albicans</i>    | Fruits       | Antioxidant and anti-inflammatory            | [13] |
| Caffeic acid                                                 | 80 | CID 689043  | <i>M. chamissois</i>  | Leaves       | Antimicrobial, cytotoxic and Antioxidant     | [6]  |
| Casuarictin                                                  | 81 | CID 73644   | <i>M. rubiginosa</i>  | Leaves       | -                                            | [61] |
| Casuarinin isomer                                            | 82 | CID 442673  | <i>M. minutiflora</i> | Leaves       | Anti-inflammatory and antinociceptive        | [14] |
| Cinnamic acid                                                | 83 | CID 444539  | <i>M. albicans</i>    | Fruits       | Antioxidant and anti-inflammatory            | [13] |
| Ellagic acid pentoside                                       | 84 | -           | <i>M. latecrenata</i> | Leaves       | Antioxidant Antibacterial and antimutagenic  | [16] |
| Ellagic acid rhamnoside                                      | 85 | -           | <i>M. latecrenata</i> | Leaves       | Antioxidant, antibacterial and antimutagenic | [16] |
|                                                              |    |             | <i>M. myriantha</i>   | Aerial parts | -                                            | [67] |
| Ellagic acid                                                 | 86 | CID 5281855 | <i>M. minutiflora</i> | Leaves       | Anti-inflammatory and antinociceptive        | [14] |
|                                                              |    |             | <i>M. latecrenata</i> |              | Antibacterial                                | [47] |
| Ethyl gallate                                                | 87 | CID 553710  | <i>M. albicans</i>    | Leaves       | Anti-inflammatory                            | [32] |
|                                                              |    |             | <i>M. rubiginosa</i>  | Leaves       | -                                            | [61] |
| Gallic acid                                                  | 88 | CID 370     | <i>M. albicans</i>    | Fruits       | Antioxidant and anti-inflammatory            | [13] |
|                                                              |    |             | <i>M. myriantha</i>   | Aerial parts | -                                            | [67] |
|                                                              |    |             | <i>M. cabucu</i>      | Aerial parts | -                                            | [62] |
| HHDP galloylglucose                                          | 89 | -           | <i>M. minutiflora</i> | Leaves       | Anti-inflammatory and antinociceptive        | [14] |
| HHDP-Hexoside                                                | 90 | -           | <i>M. albicans</i>    | Leaves       | Anti-inflammatory                            | [32] |
| Malic acid                                                   | 91 | CID 525     | <i>M. albicans</i>    | Fruits       | Antioxidant and anti-inflammatory            | [13] |
| Methyl gallate                                               | 92 | CID 7428    | <i>M. albicans</i>    | Fruits       | Antioxidant and anti-inflammatory            | [13] |
| Miconidin                                                    | 93 | CID 169581  | <i>M. willdenowii</i> | Leaves       | Leishmanicidal and antimicrobial             | [18] |
| <i>p</i> -Coumaric acid                                      | 94 | CID 637542  | <i>M. albicans</i>    | Fruits       | Antioxidant and anti-inflammatory            | [13] |
| Pedunculagin                                                 | 95 | CID 442688  | <i>M. albicans</i>    | Leaves       | Anti-inflammatory                            | [32] |
| Pyrocatechol                                                 | 96 | CID 66993   | <i>M. albicans</i>    | Fruits       | Antioxidant and anti-inflammatory            | [13] |

|                                                                                               |     |              |                        |              |                                              |      |
|-----------------------------------------------------------------------------------------------|-----|--------------|------------------------|--------------|----------------------------------------------|------|
| Quinic acid                                                                                   | 97  | CID 6508     | <i>M. albicans</i>     | Fruits       | Antioxidant and anti-inflammatory            | [13] |
| Salicylic acid                                                                                | 98  | CID 338      | <i>M. albicans</i>     | Fruits       | Antioxidant and anti-inflammatory            | [13] |
| Schizandriside                                                                                | 99  | CID 14521043 | <i>M. rubiginosa</i>   | Leaves       | -                                            | [61] |
| Tris-galloyl-HHDP-glucose isomer                                                              | 100 | -            | <i>M. latecrenata</i>  | Leaves       | Antioxidant, antibacterial and antimutagenic | [16] |
|                                                                                               |     |              |                        |              | Antiplasmodial                               | [16] |
| $\beta$ -Glucogallin                                                                          | 101 | CID 124021   | <i>M. albicans</i>     | Fruits       | Antioxidant and anti-inflammatory            | [13] |
| <b>Terpenoids</b>                                                                             |     |              |                        |              |                                              |      |
| (+)-Trans-carveol                                                                             | 102 | CID 94221    | <i>M. albicans</i>     | Fruits       | Antioxidant and anti-inflammatory            | [13] |
| 1-Octen-3-ol                                                                                  | 103 | CID 18827    | <i>M. ferruginata</i>  | Aerial parts | -                                            | [68] |
| Eugenol                                                                                       | 104 | CID 3314     | <i>M. ferruginata</i>  | Aerial parts | -                                            | [68] |
| Germacrene D                                                                                  | 105 | CID 5317570  | <i>M. ferruginata</i>  | Aerial parts | -                                            | [68] |
| L-Borneol                                                                                     | 106 | CID 1201518  | <i>M. ferruginata</i>  | Aerial parts | -                                            | [68] |
| $\alpha$ -Copaene                                                                             | 107 | CID 70678558 | <i>M. ferruginata</i>  | Aerial parts | -                                            | [68] |
| $\alpha$ -Humulene                                                                            | 108 | CID 24798693 | <i>M. ferruginata</i>  | Aerial parts | -                                            | [68] |
| $\beta$ -Caryophyllene                                                                        | 109 | CID 5281515  | <i>M. ferruginata</i>  | Aerial parts | -                                            | [68] |
| $\beta$ -Cubebene                                                                             | 110 | CID 93081    | <i>M. ferruginata</i>  | Aerial parts | -                                            | [68] |
| $\beta$ -Elemene                                                                              | 111 | CID 6918391  | <i>M. ferruginata</i>  | Aerial parts | -                                            | [68] |
| <b>Triterpenes and steroids</b>                                                               |     |              |                        |              |                                              |      |
| 28-carboxy-3-oxoolean-12-en-21a-yl acetate                                                    | 112 | -            | <i>M. macrothyrsa</i>  | Leaves       | -                                            | [69] |
| 2 $\alpha$ -hydroxyursolic acid                                                               | 113 | -            | <i>M. ligustroides</i> | Aerial parts | Antiparasitic                                | [34] |
|                                                                                               |     |              | <i>M. sellowiana</i>   |              | Antibacterial                                | [41] |
|                                                                                               |     |              | <i>M. sellowiana</i>   |              |                                              |      |
| 2 $\alpha$ ,3 $\alpha$ ,19 $\alpha$ , 23-tetrahydroxyurs-12-ene-28-oic acid (myrianthic acid) | 114 | CID 182497   | <i>M. trailii</i>      | Aerial parts | -                                            | [64] |
| 2 $\alpha$ ,3 $\beta$ ,19 $\alpha$ -trihydroxyolean-12-ene-24,28-dioic acid (bartogenic acid) | 115 | CID 45272347 | <i>M. trailii</i>      | Aerial parts | -                                            | [64] |
| 3-( <i>E</i> )- <i>p</i> -coumaroyl- $\alpha$ -amyrin                                         | 116 | -            | <i>M. albicans</i>     | Leaves       | Antioxidant                                  | [51] |
| 3- <i>epi</i> -sumaresinolic acid                                                             | 117 | -            | <i>M. albicans</i>     | Leaves       | Antidiabetic                                 | [65] |
| 3- <i>O</i> - <i>cis</i> - <i>p</i> -coumaroyl maslinic acid                                  | 118 | -            | <i>M. albicans</i>     | Leaves       | Antidiabetic                                 | [65] |
| 3- <i>O</i> - <i>trans</i> - <i>p</i> -coumaroyl 2 $\alpha$ -hydroxydulcioic acid             | 119 | -            | <i>M. albicans</i>     | Leaves       | Antidiabetic                                 | [65] |
| 3- <i>O</i> - <i>trans</i> - <i>p</i> -coumaroyl maslinic acid                                | 120 | CID 16664517 | <i>M. albicans</i>     | Leaves       | Antidiabetic                                 | [65] |
|                                                                                               |     |              | <i>M. trailii</i>      | Aerial parts | -                                            | [64] |
|                                                                                               |     |              | <i>M. ligustroides</i> | Aerial parts | Antiparasitic                                | [33] |
|                                                                                               |     |              | <i>M. sellowiana</i>   |              |                                              |      |
|                                                                                               |     |              | <i>M. minutiflora</i>  | Leaves       | Anti-inflammatory and antinociceptive        | [14] |
| Arjunolic acid                                                                                | 121 | CID 73641    | <i>M. albicans</i>     | Fruits       | Antioxidant and anti-inflammatory            | [13] |

|                          |     |              |                                                                                                                                            |              |                                       |                      |
|--------------------------|-----|--------------|--------------------------------------------------------------------------------------------------------------------------------------------|--------------|---------------------------------------|----------------------|
| Asiatic acid             | 122 | CID 119034   | <i>M. albicans</i>                                                                                                                         | Fruits       | Antioxidant and anti-inflammatory     | [13]                 |
| Campesterol              | 123 | CID 173183   | <i>M. sellowiana</i><br><i>M. albicans</i><br><i>M. pepericarpa</i>                                                                        | Aerial parts | -                                     | [34]                 |
| epi-Betulinic acid       | 124 | CID 485711   | <i>M. albicans</i>                                                                                                                         | Leaves       | Antioxidant                           | [51]                 |
| epi-ursolic acid         | 125 | -            | <i>M. albicans</i>                                                                                                                         | Leaves       | Antioxidant                           | [51]                 |
| Friedelin                | 126 | CID 91472    | <i>M. pepericarpa</i>                                                                                                                      | Aerial parts | -                                     | [34]                 |
| Gypsogenic acid          | 127 | CID 15560324 | <i>M. fallax</i><br><i>M. stenostachya</i>                                                                                                 | Aerial parts | Trypanocide                           | [33]                 |
|                          |     |              | <i>M. stenostachya</i>                                                                                                                     |              | Antibacterial                         | [41]                 |
| Lupeol                   | 128 | CID 259846   | <i>M. rubiginosa</i><br><i>M. fallax</i><br><i>M. sellowiana</i><br><i>M. albicans</i><br><i>M. pepericarpa</i>                            | Aerial parts | -                                     | [34]                 |
|                          |     |              | <i>M. burchellii</i>                                                                                                                       |              |                                       |                      |
|                          |     |              |                                                                                                                                            | Leaves       | Cytotoxic                             | [55]                 |
| Maslinic acid            | 129 | CID 73659    | <i>M. ligustroides</i><br><i>M. sellowiana</i><br><i>M. stenostachya</i>                                                                   | Aerial parts | Antiparasitic                         | [34]                 |
|                          |     |              |                                                                                                                                            |              | Antibacterial                         | [41]                 |
|                          |     |              |                                                                                                                                            | Leaves       | Antidiabetic                          | [65]                 |
|                          |     |              | <i>M. albicans</i>                                                                                                                         | Fruits       | Antioxidant and anti-inflammatory     | [13]                 |
| Myrianthnic acid isomer  | 130 | CID 182497   | <i>M. minutiflora</i>                                                                                                                      | Leaves       | Anti-inflammatory and antinociceptive | [14]                 |
|                          |     |              | <i>M. albicans</i>                                                                                                                         | Fruits       | Antioxidant and anti-inflammatory     | [13]                 |
| Oleanolic acid           | 131 | CID 10494    | <i>M. fallax</i><br><i>M. stenostachya</i><br><i>M. ligustroides</i><br><i>M. sellowiana</i><br><i>M. langsdorffii</i><br><i>M. fallax</i> | Aerial parts | Trypanocide                           | [33]                 |
|                          |     |              |                                                                                                                                            |              | Antiparasitic                         | [34]                 |
|                          |     |              |                                                                                                                                            |              | Antileishmanial                       | [28]                 |
|                          |     |              |                                                                                                                                            |              | Antibacterial and antitumor           | [41,57]              |
|                          |     |              |                                                                                                                                            |              | Analgesic and anti-inflammatory       | [15]                 |
|                          |     |              | <i>M. albicans</i>                                                                                                                         |              | Antidiabetic                          | [65]                 |
|                          |     |              | <i>M. rubiginosa</i>                                                                                                                       |              | -                                     | [19]                 |
|                          |     |              | <i>M. albicans</i>                                                                                                                         | Fruits       | Antioxidant and anti-inflammatory     | [13]                 |
|                          |     |              | <i>M. ligustroides</i>                                                                                                                     |              | Antibacterial                         | [44]                 |
|                          |     |              | <i>M. ferruginata</i><br><i>M. chamissois</i><br><i>M. burchellii</i>                                                                      | Leaves       | Insecticide                           | [26]<br>[66]<br>[55] |
| Stigmast-4-ene-3,6-dione | 132 | CID 5490007  | <i>M. trailii</i>                                                                                                                          | Aerial parts | -                                     | [64]                 |
| Stigmasterol             | 133 | CID 5280794  | <i>M. fallax</i><br><i>M. sellowiana</i><br><i>M. ligustroides</i><br><i>M. albicans</i><br><i>M. pepericarpa</i><br><i>M. ferruginata</i> | Aerial parts | -                                     | [34]                 |
|                          |     |              |                                                                                                                                            |              |                                       |                      |
| Sumaresinolic acid       | 134 | CID 4660579  | <i>M. fallax</i><br><i>M. stenostachya</i>                                                                                                 | Aerial parts | Antibacterial                         | [41]                 |

|                                           |     |              |                                                                                                                                           |                  |                                   |                     |
|-------------------------------------------|-----|--------------|-------------------------------------------------------------------------------------------------------------------------------------------|------------------|-----------------------------------|---------------------|
|                                           |     |              | <i>M. albicans</i>                                                                                                                        | Leaves           | Antidiabetic                      | [65]                |
|                                           |     |              | <i>M. ligustroides</i><br><i>M. sellowiana</i>                                                                                            |                  | Antiparasitic                     | [34]                |
|                                           |     |              | <i>M. fallax</i><br><i>M. stenostachya</i>                                                                                                |                  | Trypanocide                       | [33]                |
|                                           |     |              | <i>M. fallax</i><br><i>M. albicans</i>                                                                                                    | Aerial parts     | Antibacterial<br>Antitumor        | [41]<br>[57]        |
| Ursolic acid                              | 135 | CID 13073356 |                                                                                                                                           |                  | Analgesic and anti-inflammatory   | [15]                |
|                                           |     |              | <i>M. langsdorffii</i>                                                                                                                    |                  | Antidiabetic                      | [65]                |
|                                           |     |              | <i>M. rubiginosa</i>                                                                                                                      |                  | Antileishmanial                   | [28]<br>[19]        |
|                                           |     |              | <i>M. ligustroides</i>                                                                                                                    |                  | Antioxidant                       | [51]                |
|                                           |     |              | <i>M. ferruginata</i><br><i>M. chamissois</i>                                                                                             | Leaves           | Antibacterial                     | [44]<br>Insecticide |
|                                           |     |              | <i>M. burchellii.</i>                                                                                                                     |                  |                                   | [26]<br>[66]        |
|                                           |     |              |                                                                                                                                           |                  | Cytotoxic                         | [55]                |
| $\alpha$ -Amyrin acetate                  | 136 | CID 293754   | <i>M. pepericarpa</i>                                                                                                                     | Aerial parts     | -                                 | [34]                |
|                                           |     |              | <i>M. rubiginosa</i><br><i>M. fallax</i><br><i>M. sellowiana</i><br><i>M. ligustroides</i><br><i>M. pepericarpa</i>                       | Aerial parts     | -                                 | [34]                |
| $\alpha$ -Amyrin                          | 137 | CID 73170    | <i>M. albicans</i>                                                                                                                        | Leaves           | Antioxidant                       | [51]                |
| $\beta$ -Amyrin acetate                   | 138 | CID 92156    | <i>M. pepericarpa</i>                                                                                                                     | Aerial parts     | -                                 | [34]                |
|                                           |     |              | <i>M. rubiginosa</i><br><i>M. fallax</i><br><i>M. sellowiana</i><br><i>M. ligustroides</i><br><i>M. albicans</i><br><i>M. pepericarpa</i> | Aerial parts     | -                                 | [34]                |
| $\beta$ -Amyrin                           | 139 | CID 73145    | <i>M. rubiginosa</i><br><i>M. fallax</i><br><i>M. sellowiana</i><br><i>M. ligustroides</i><br><i>M. albicans</i><br><i>M. pepericarpa</i> | Aerial parts     | -                                 | [34]                |
|                                           |     |              | <i>M. rubiginosa</i><br><i>M. fallax</i><br><i>M. sellowiana</i><br><i>M. ligustroides</i><br><i>M. albicans</i><br><i>M. pepericarpa</i> | Aerial parts     | -                                 | [34]                |
| $\beta$ -Sitosterol                       | 140 | CID 222284   | <i>M. ferruginata</i><br><i>M. burchellii.</i>                                                                                            | Leaves<br>Leaves | Insecticide<br>Cytotoxic          | [26]<br>[55]        |
| <b>Others compounds</b>                   |     |              |                                                                                                                                           |                  |                                   |                     |
| 2-methoxy-6-heptyl-1,4-benzoquinone       | 141 | -            | <i>M. lepidota</i>                                                                                                                        | Leaves           | Antimicrobial and cytotoxic       | [38]                |
| 8-Heptadecene                             | 142 | CID 5364555  | <i>M. ferruginata</i>                                                                                                                     | Aerial parts     | -                                 | [68]                |
| 8-Hexadecyne                              | 143 | CID 123387   | <i>M. ferruginata</i>                                                                                                                     | Aerial parts     | -                                 | [68]                |
| 9,10-Dihydroxy-8-oxooctadec-12-enoic acid | 144 | CID 71342303 | <i>M. albicans</i>                                                                                                                        | Fruits           | Antioxidant and anti-inflammatory | [13]                |
| Ethyl ester                               | 145 | CID 5282208  | <i>M. burchellii.</i>                                                                                                                     | Leaves           | Cytotoxic                         | [55]                |
| Hexadecane                                | 146 | CID 11006    | <i>M. ferruginata</i>                                                                                                                     | Aerial parts     | -                                 | [68]                |
| Pentadecane                               | 147 | CID 12391    | <i>M. ferruginata</i>                                                                                                                     | Aerial parts     | -                                 | [68]                |

|        |     |           |                       |        |                                  |      |
|--------|-----|-----------|-----------------------|--------|----------------------------------|------|
| Primin | 148 | CID 84800 |                       | Leaves | Schistosomicidal                 | [17] |
|        |     |           | <i>M. willdenowii</i> |        | Leishmanicidal and antimicrobial | [18] |
|        |     |           | <i>M. lepidota</i>    |        | Antimicrobial and cytotoxic      | [38] |

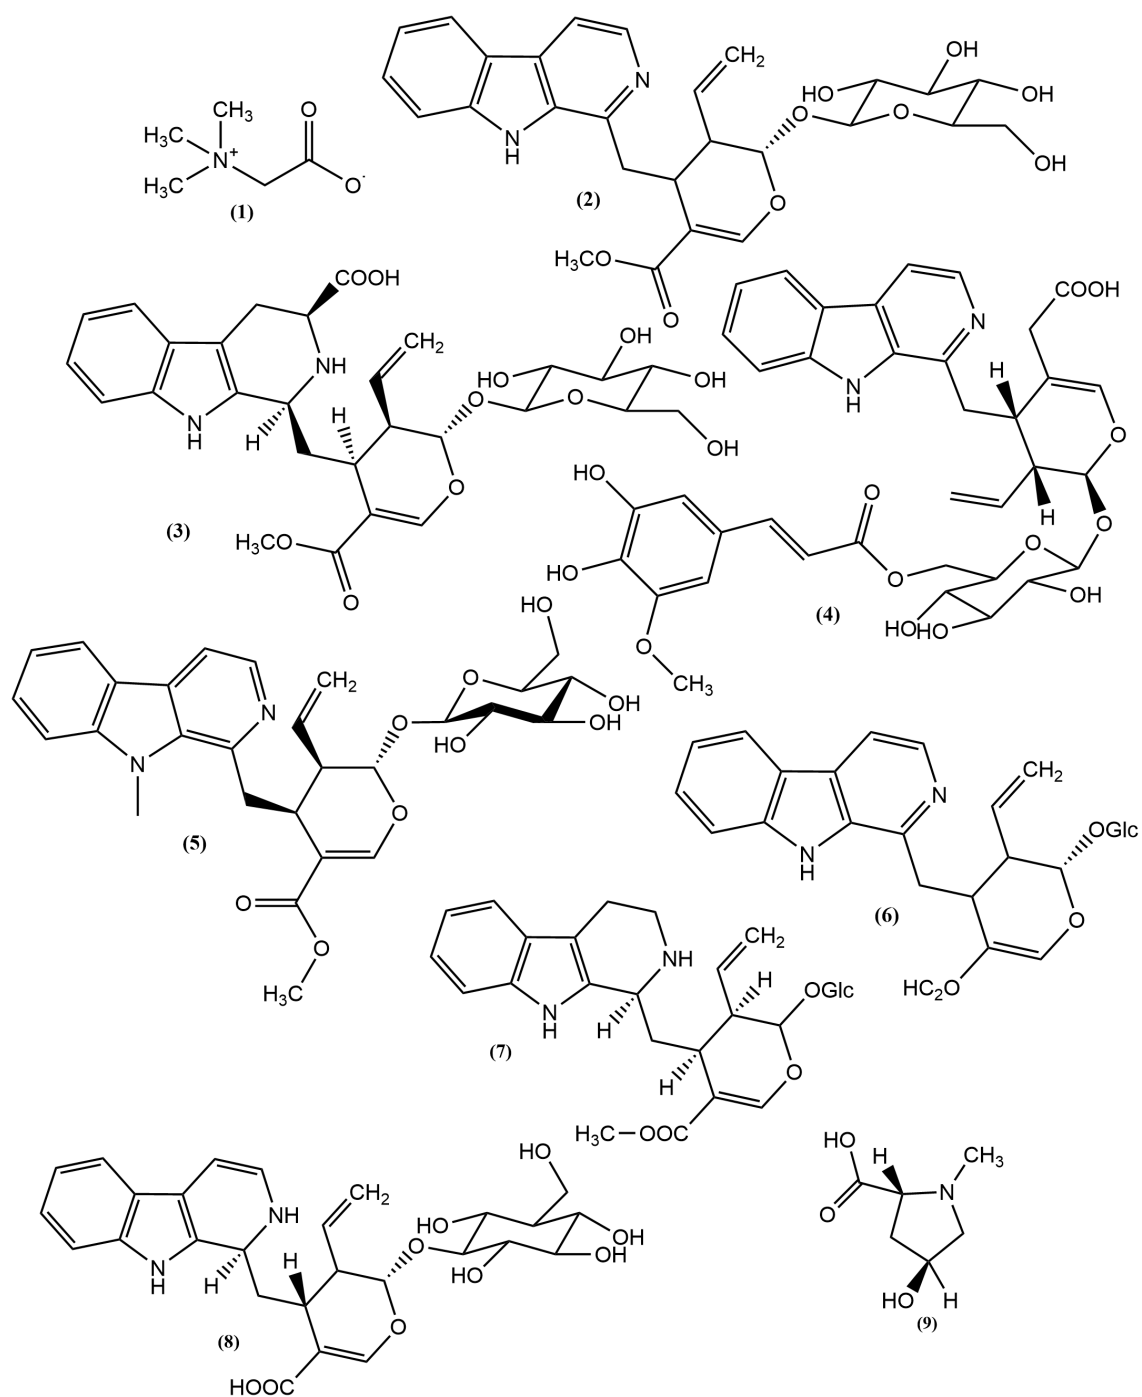

**Figure S1.** Alkaloids identified in the species of the genus *Miconia* (Compounds 1-9).



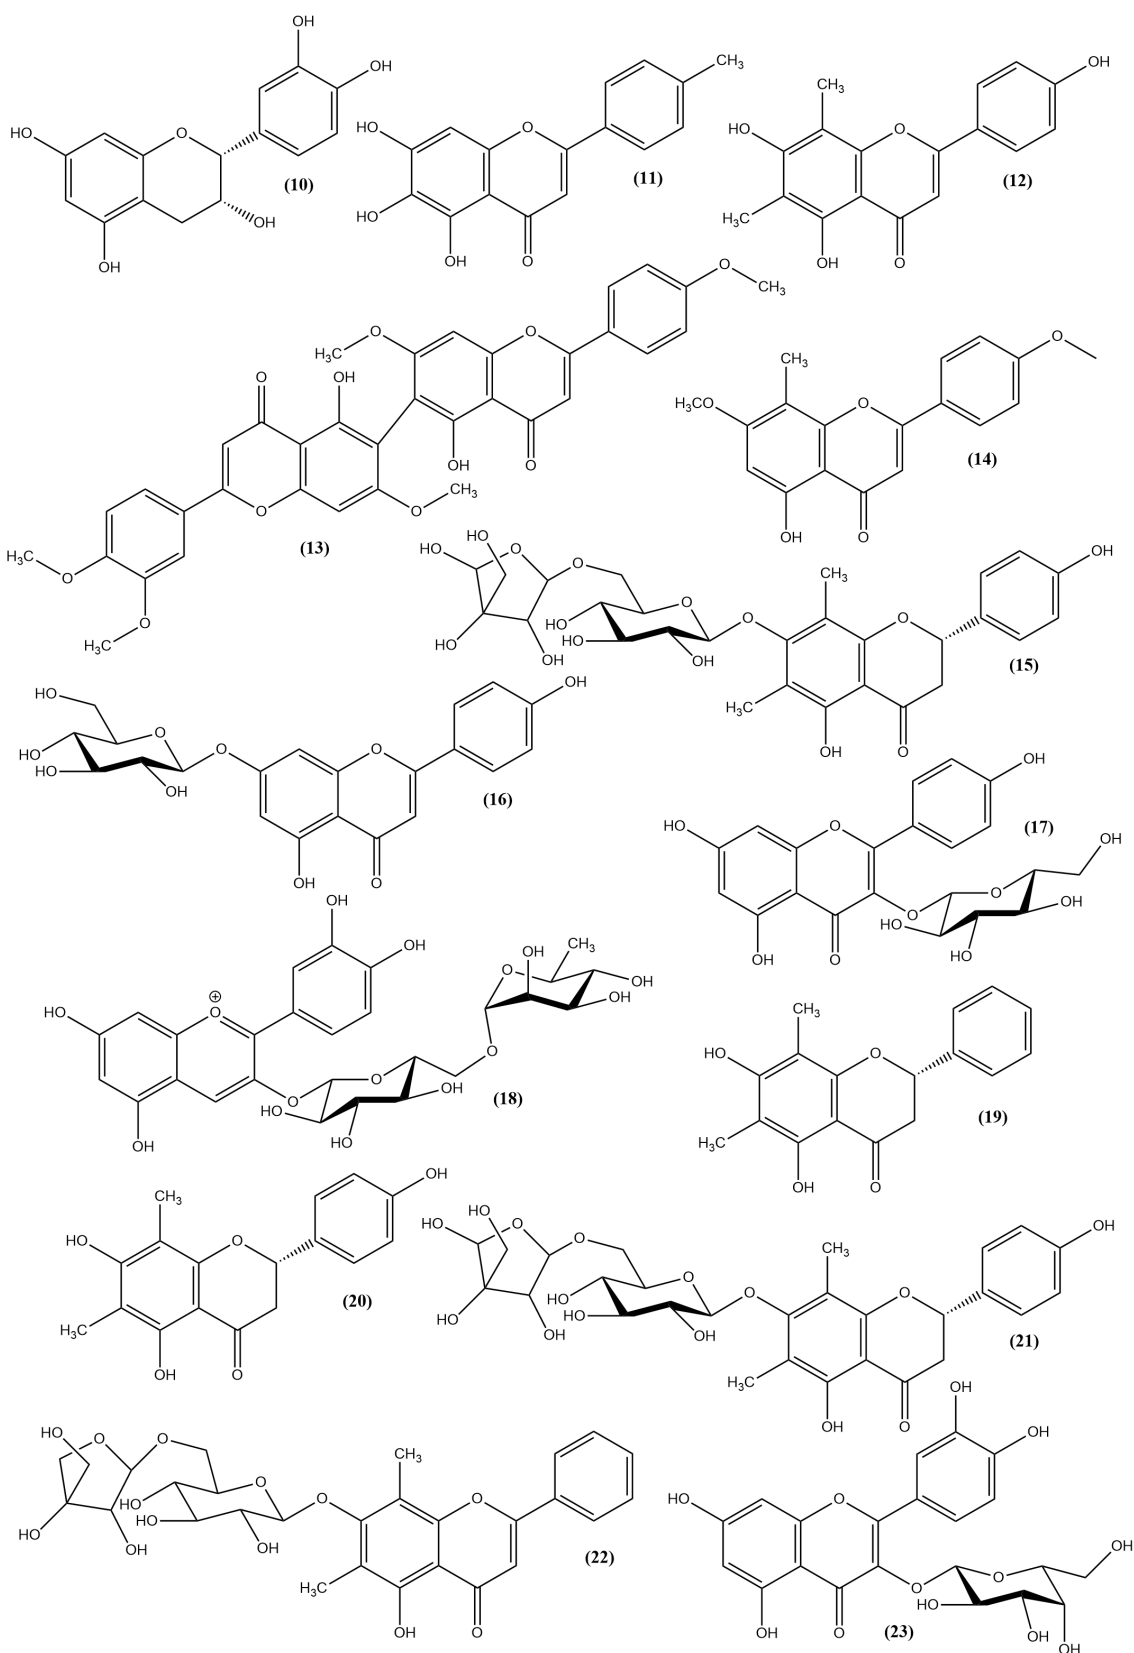

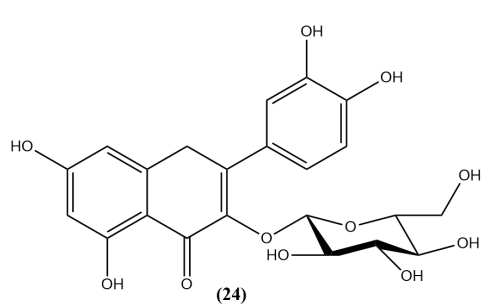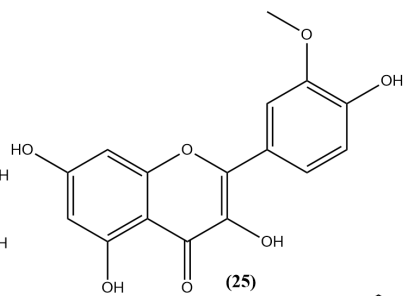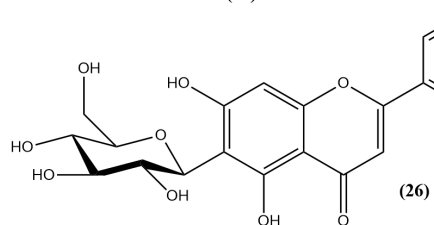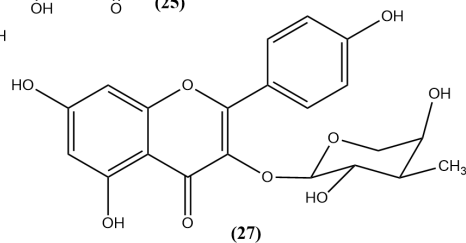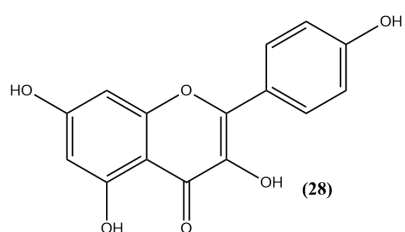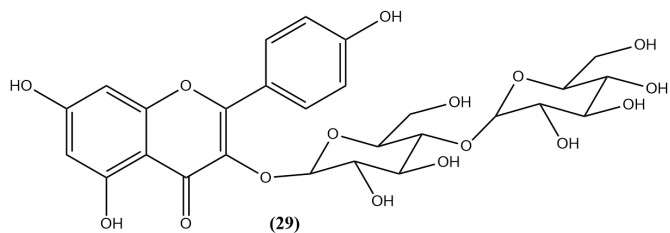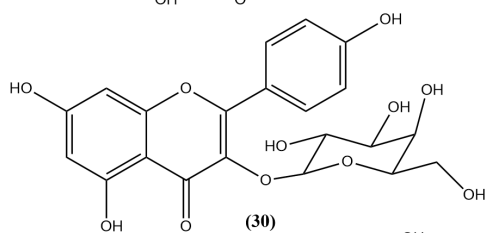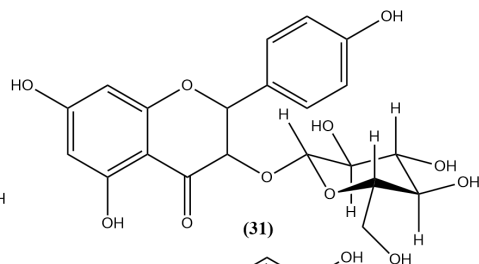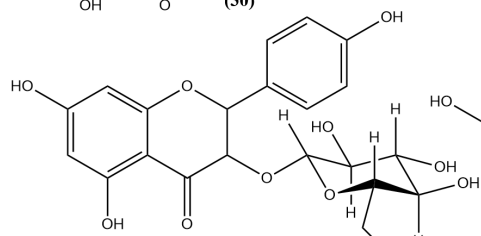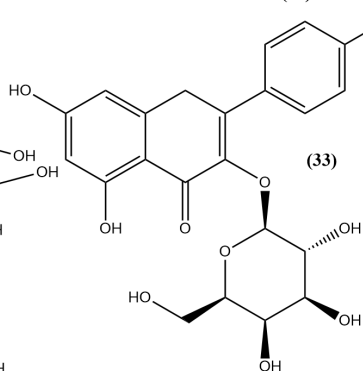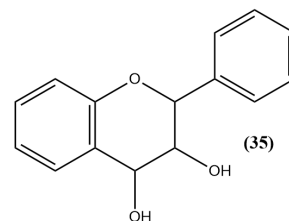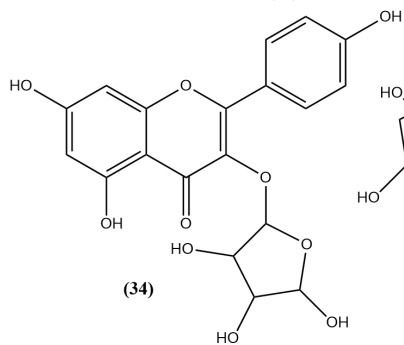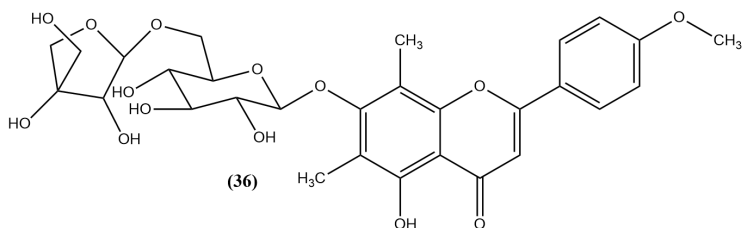

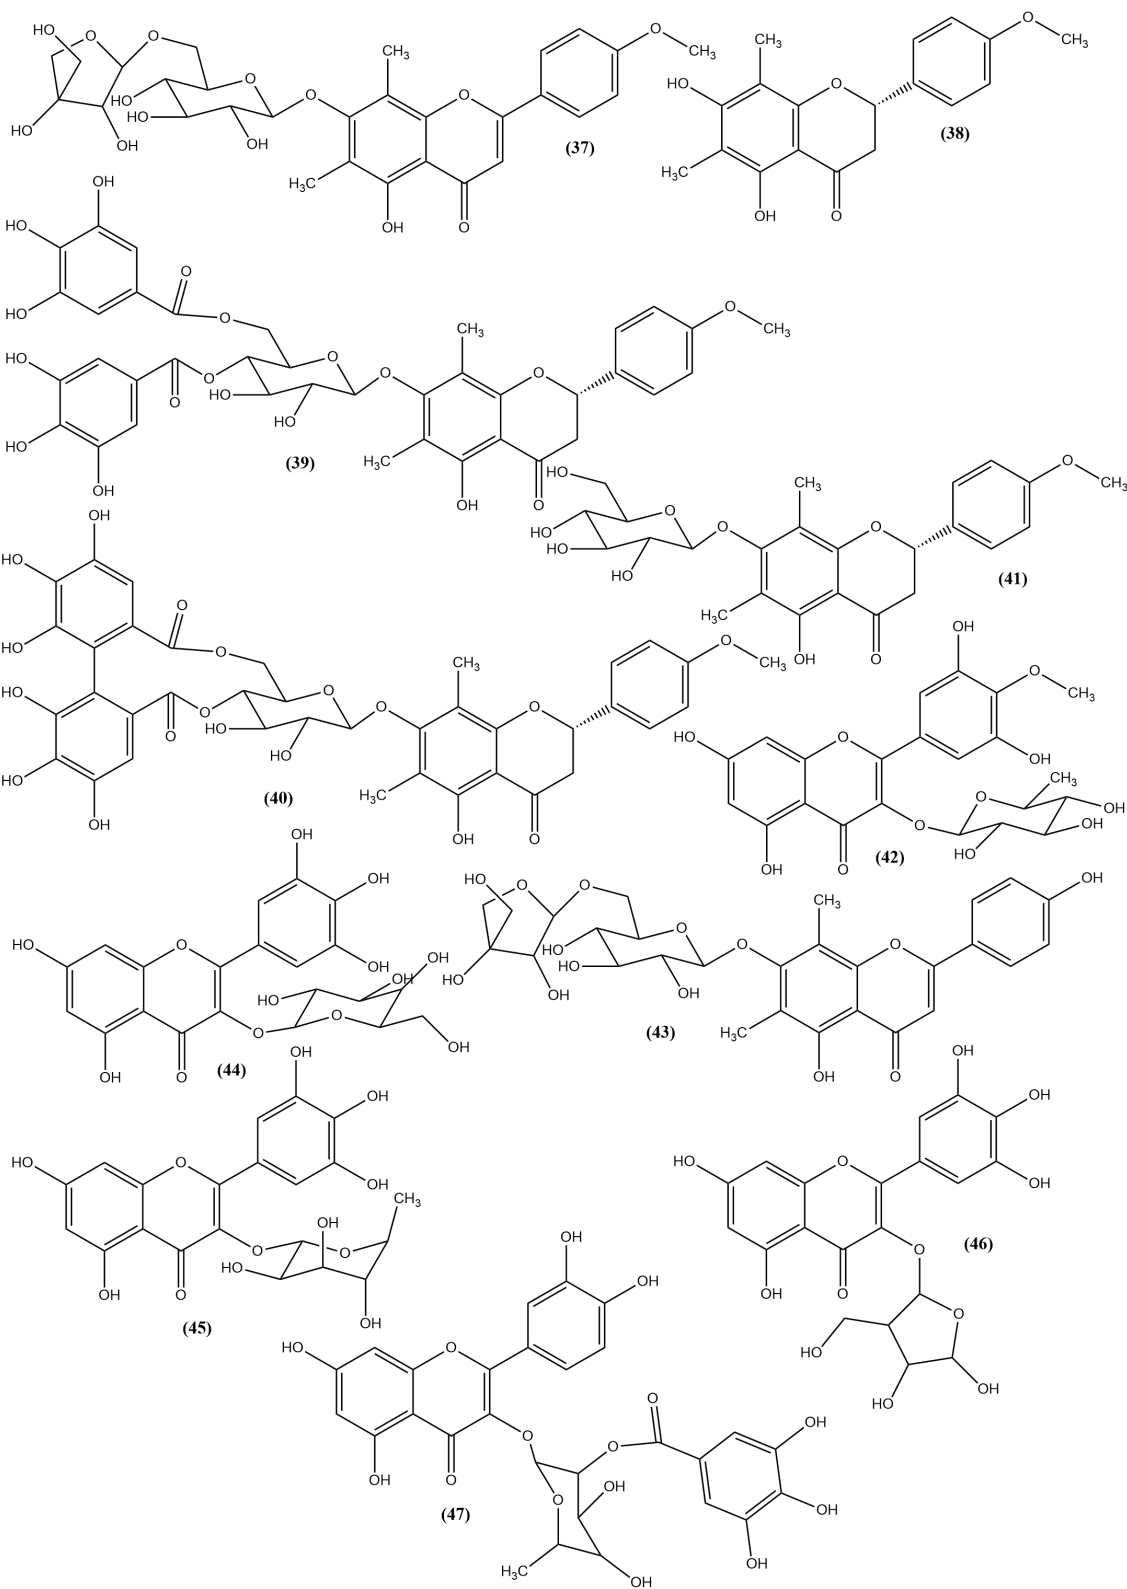

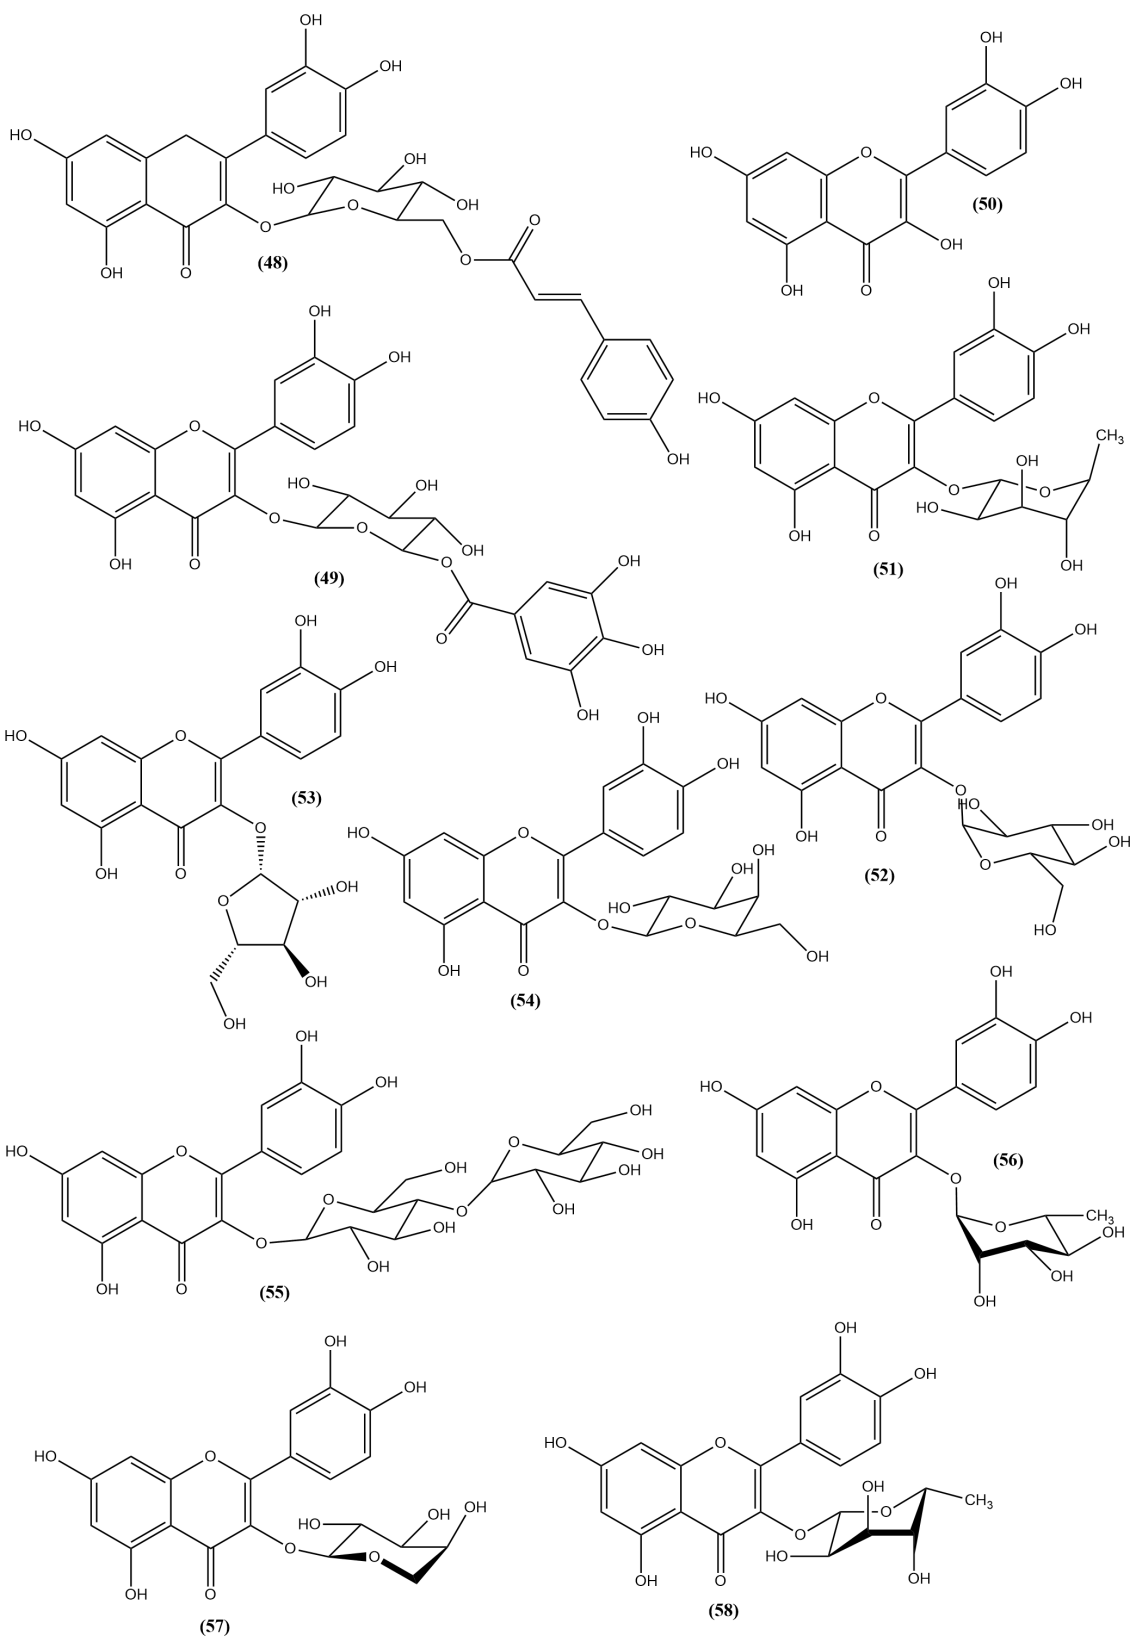

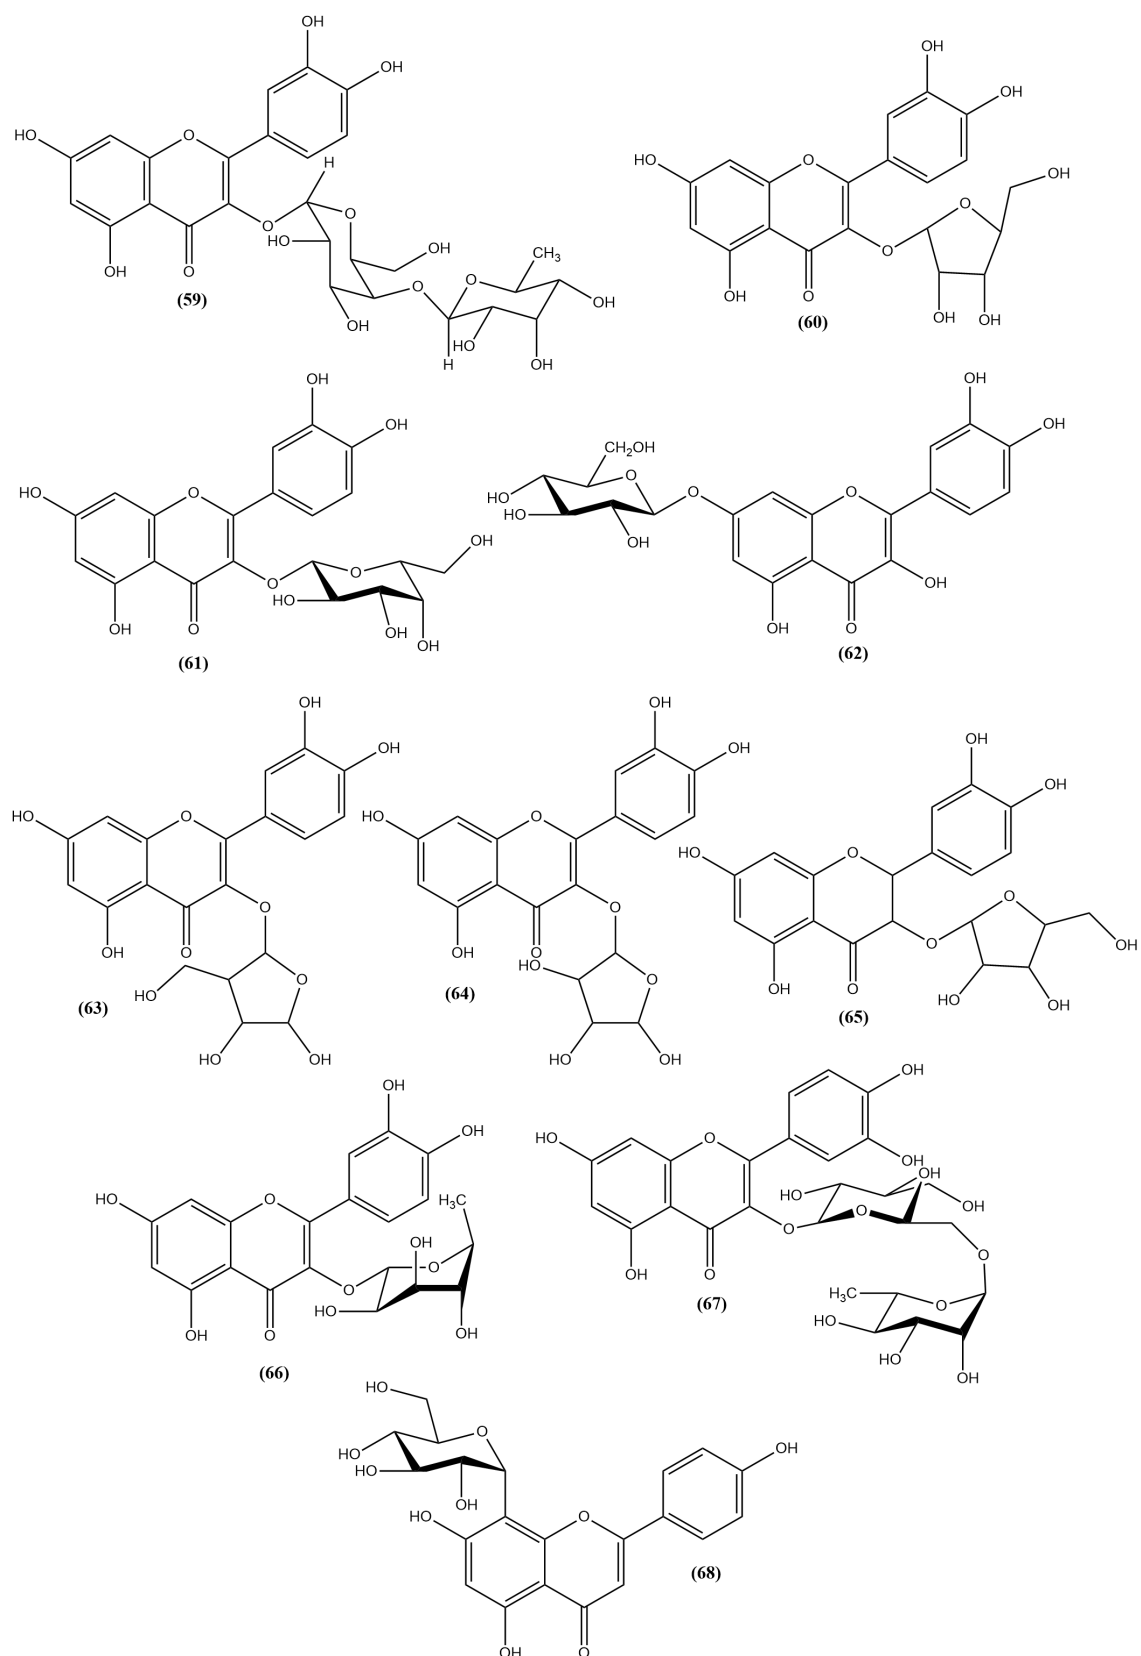

**Figure S2.** Flavonoids identified in the species of the genus *Miconia* (Compounds 10-68).

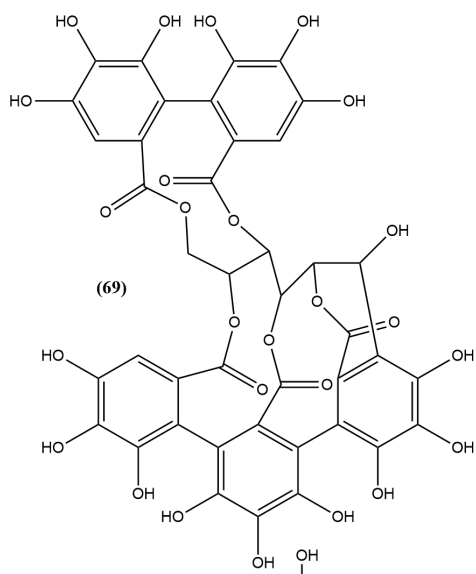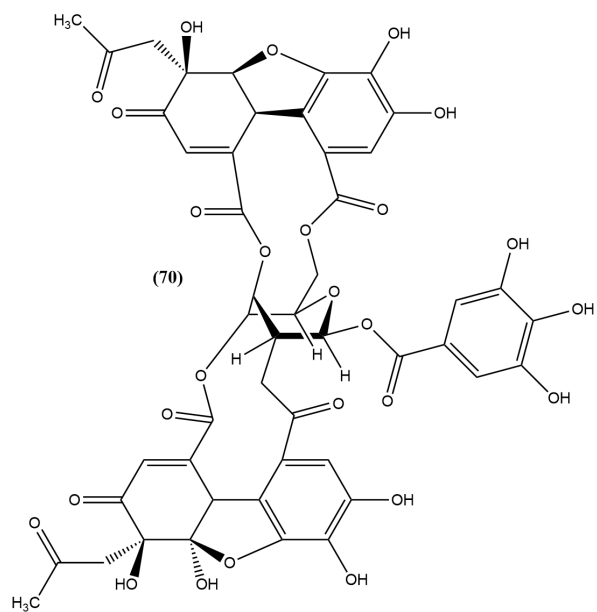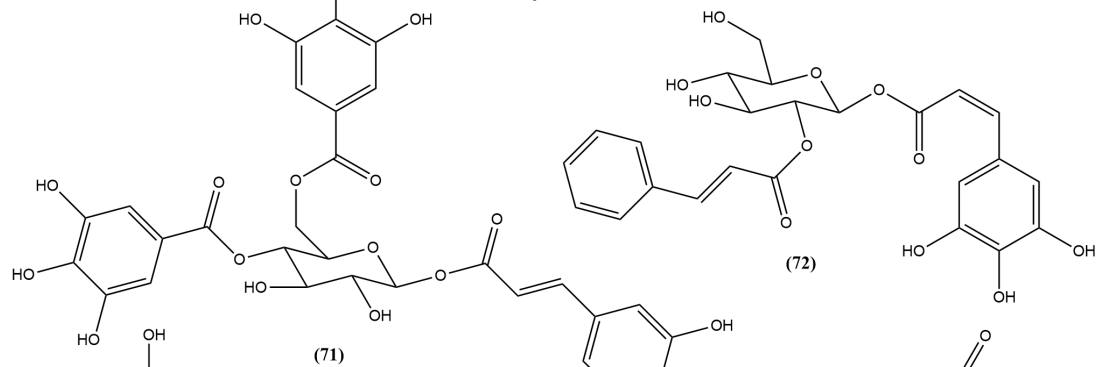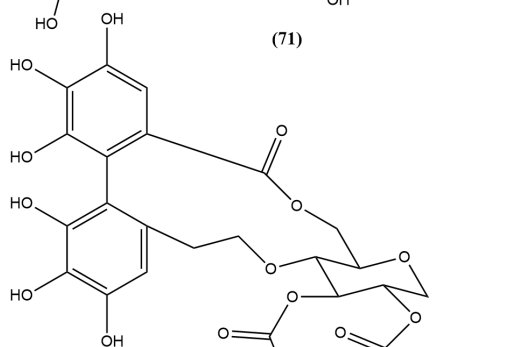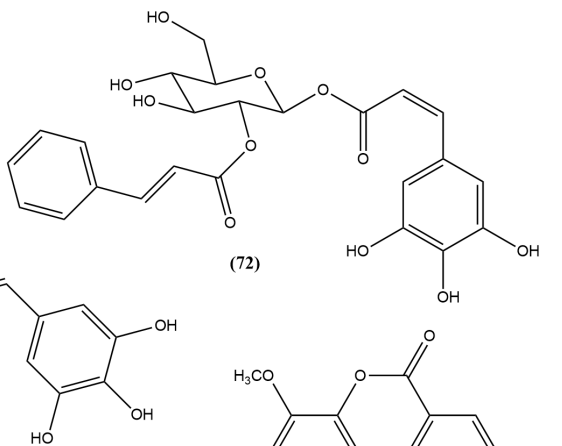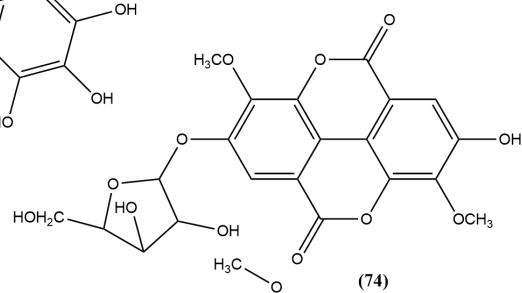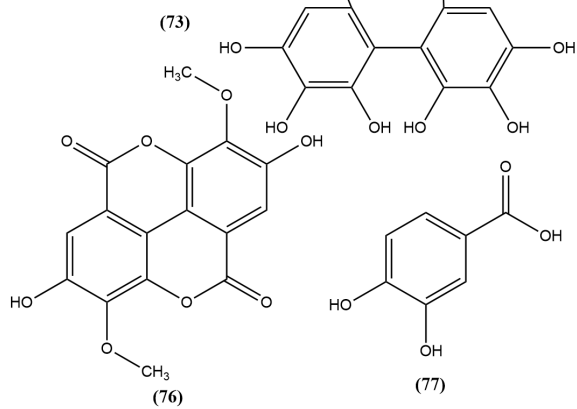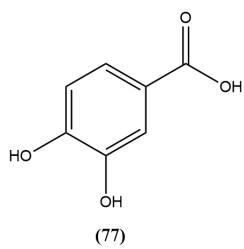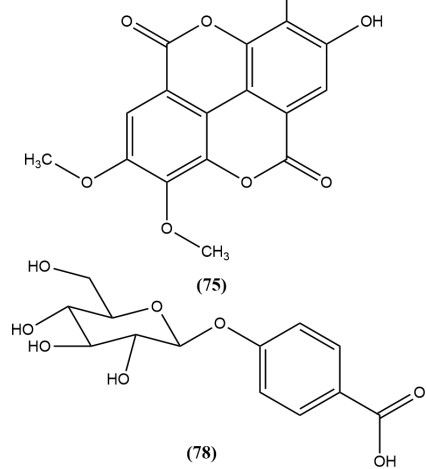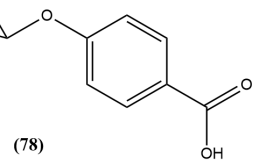

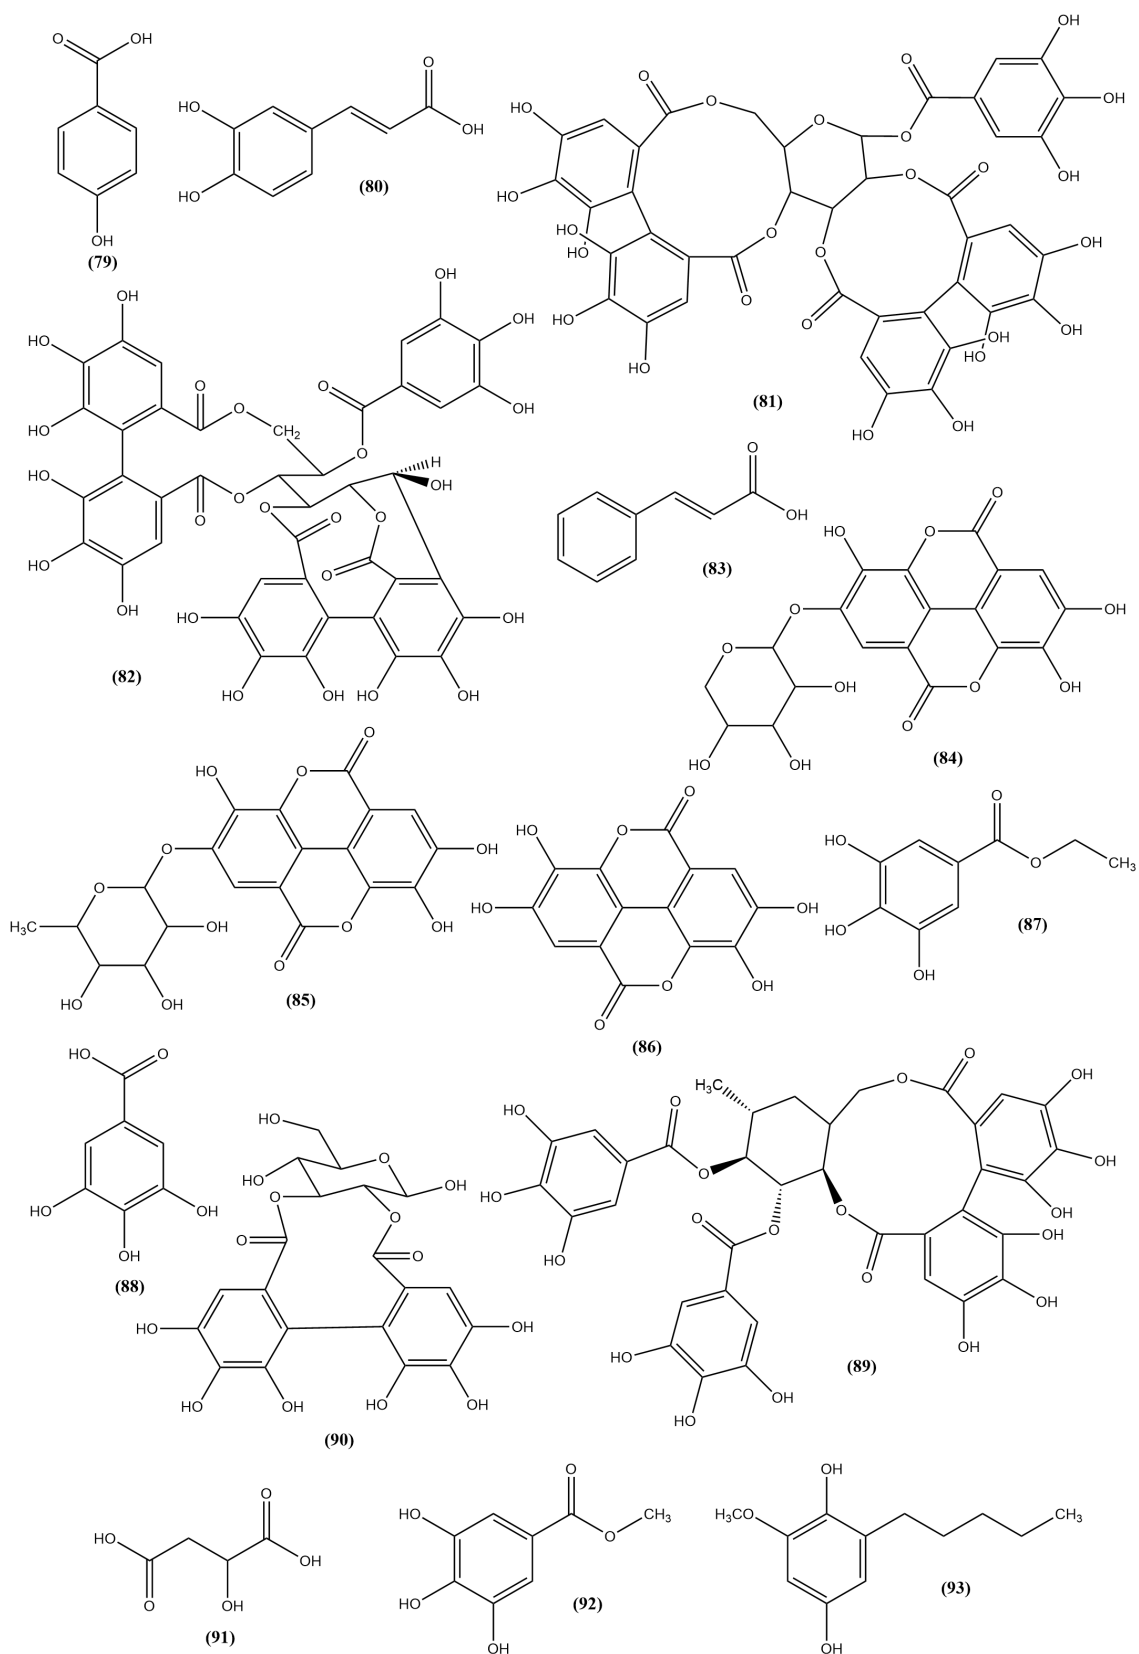

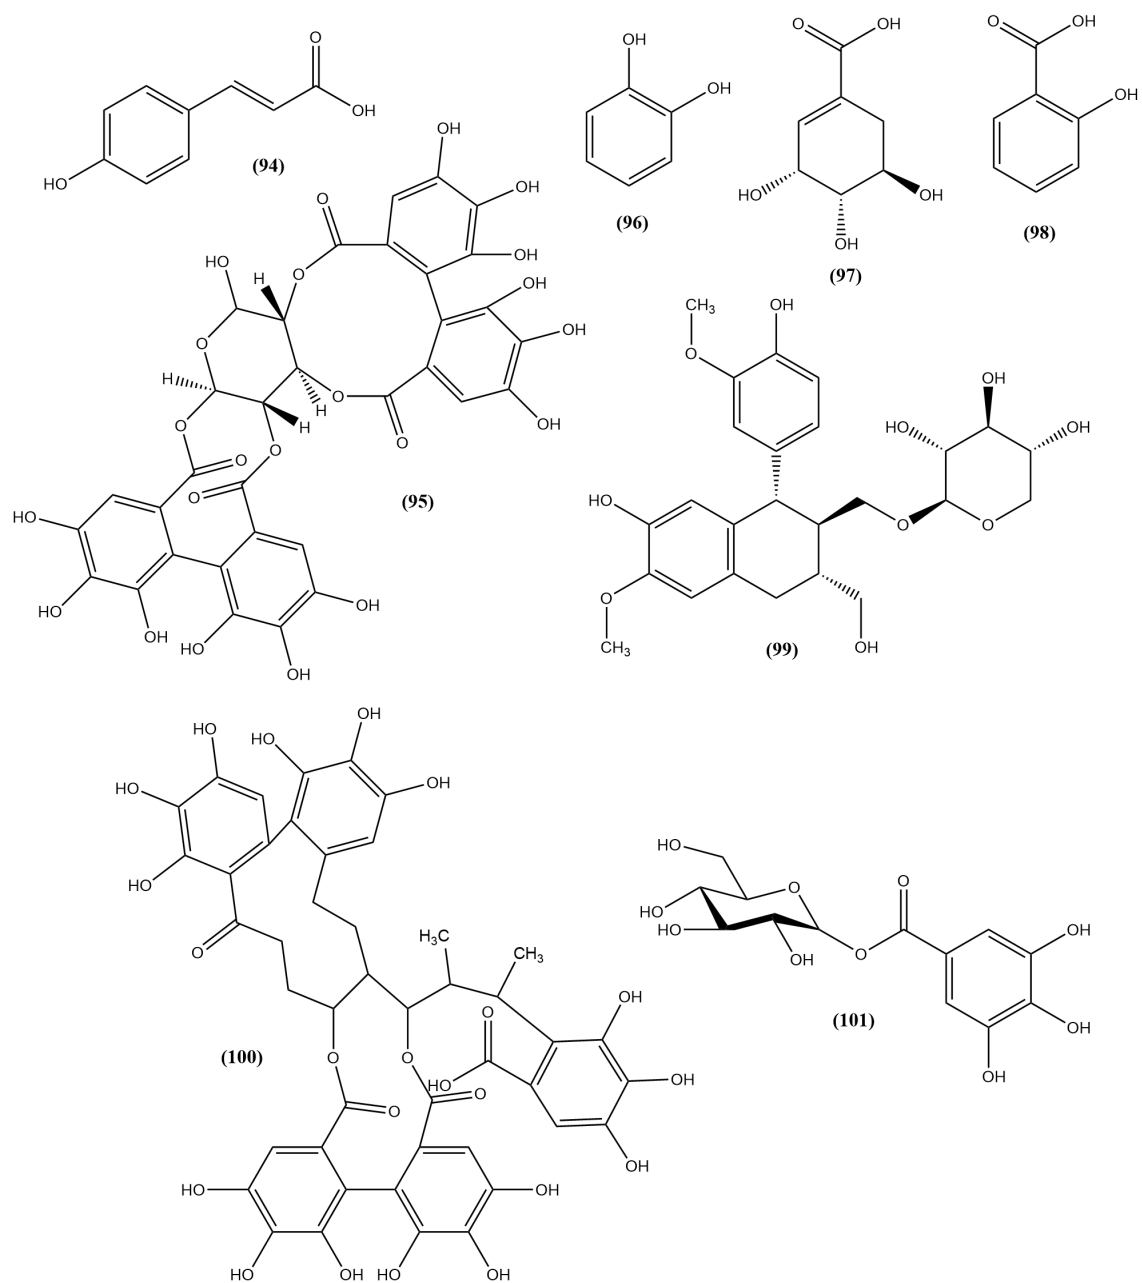

**Figure S3.** Phenolics identified in the species of the genus *Miconia* (Compounds 69-101).



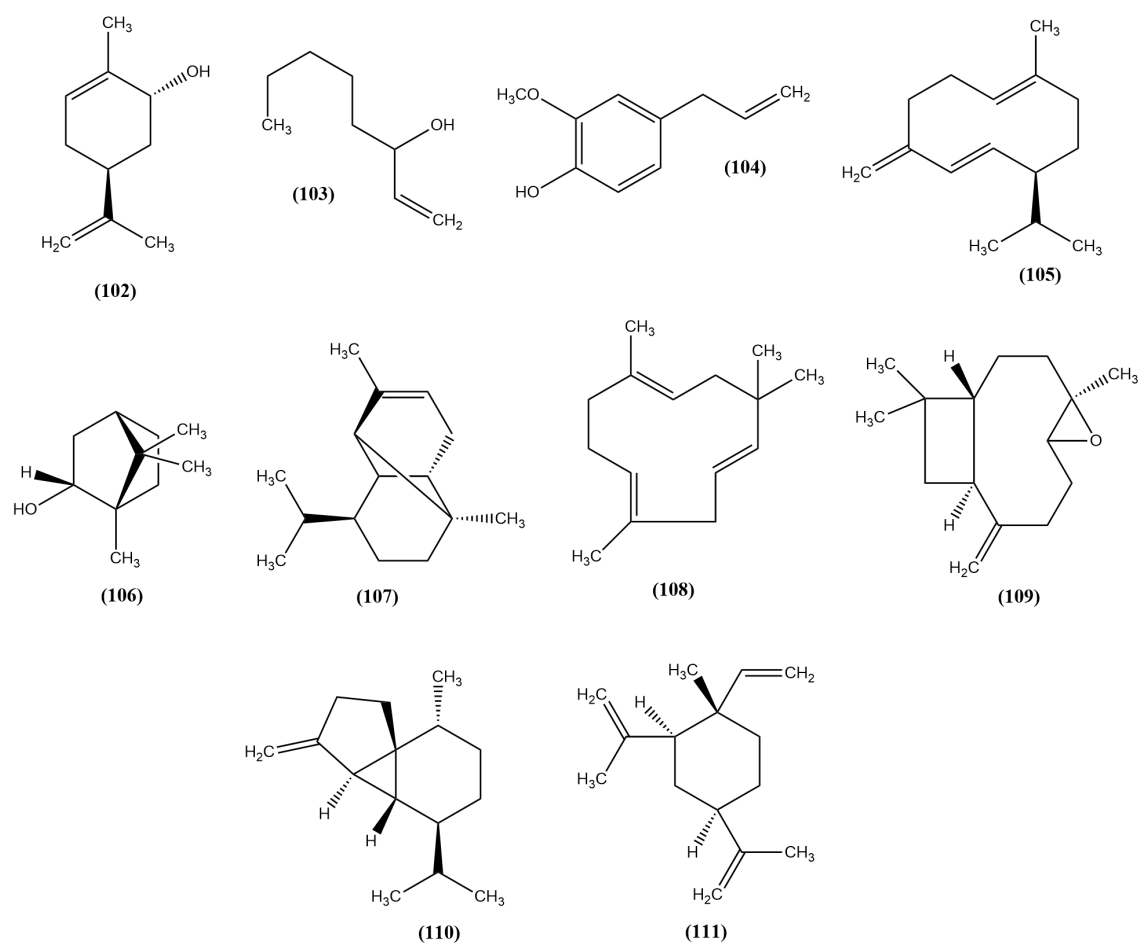

**Figure S4.** Terpenoids identified in the species of the genus *Miconia* (Compounds 102-111).

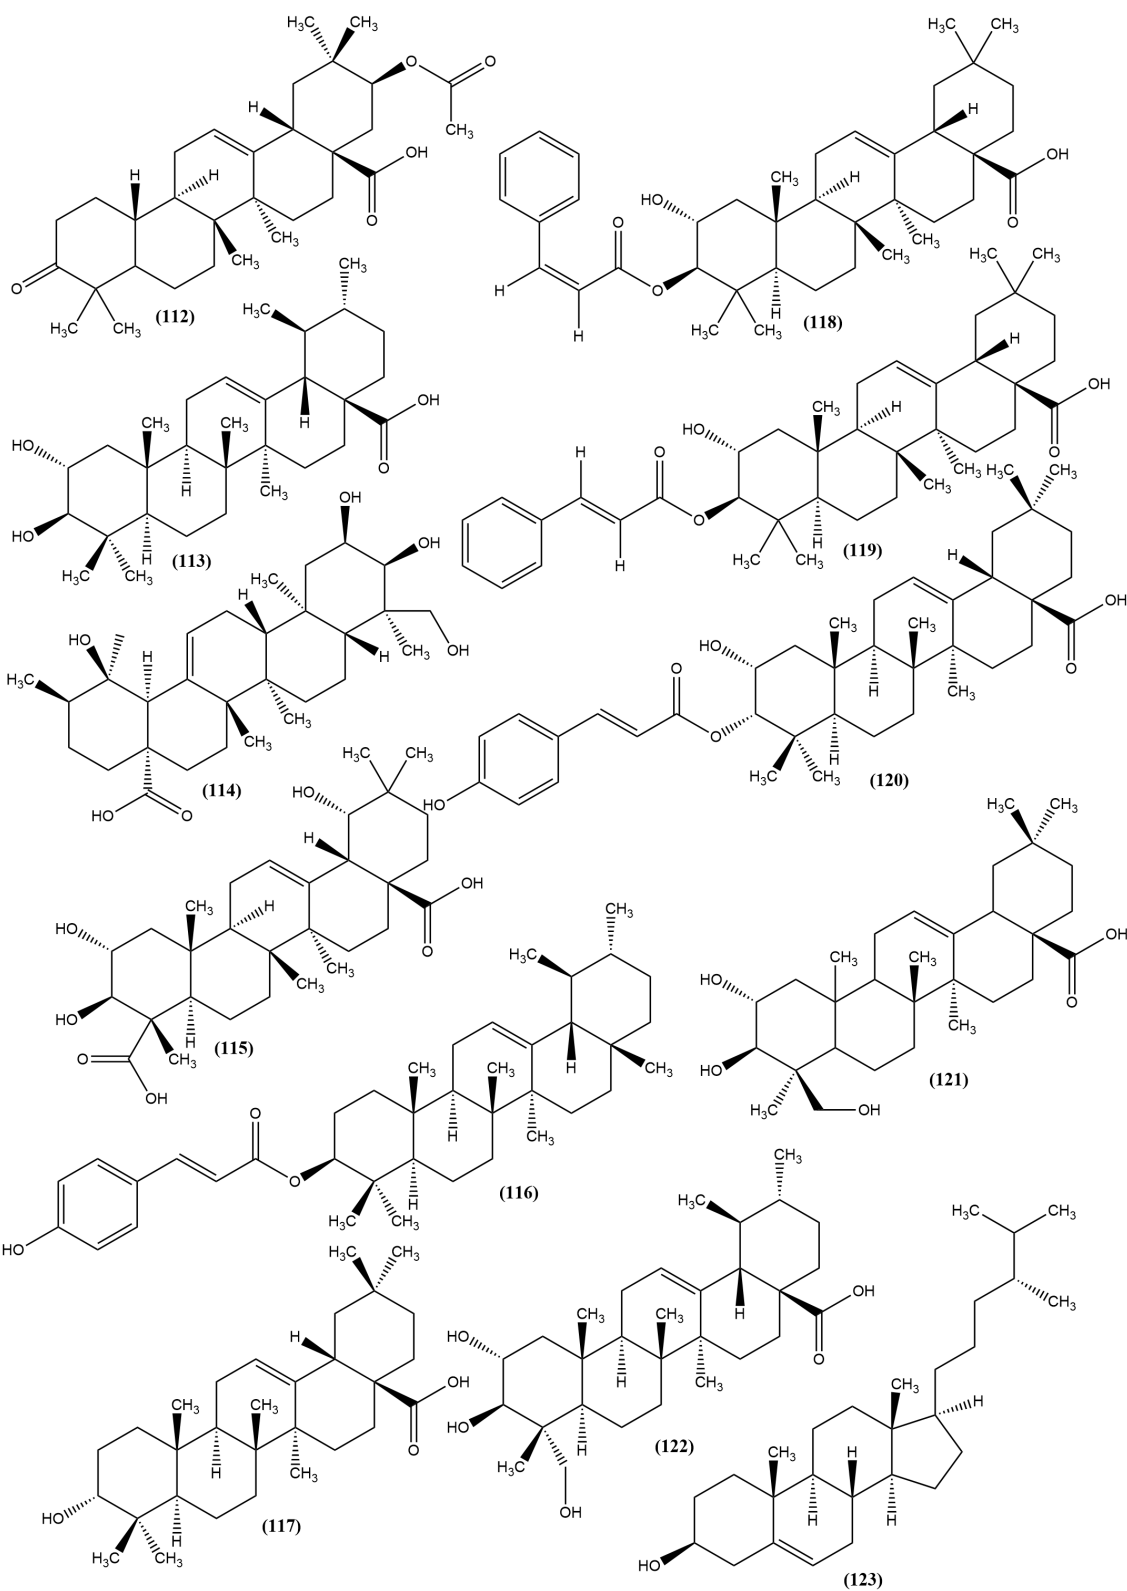

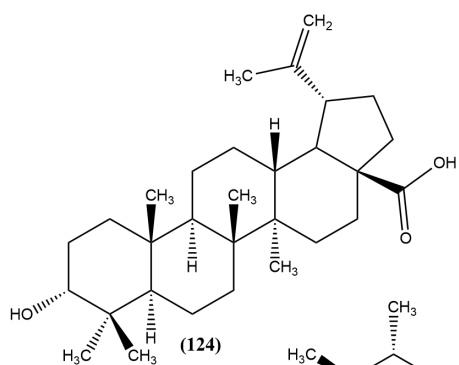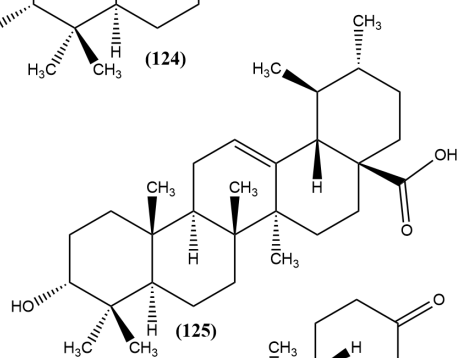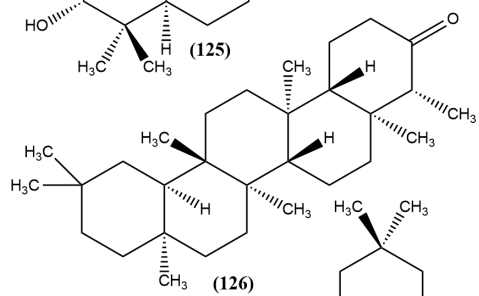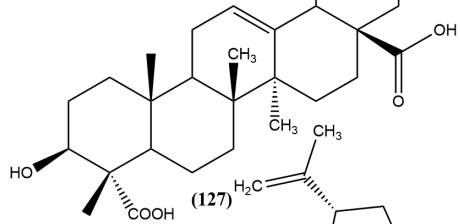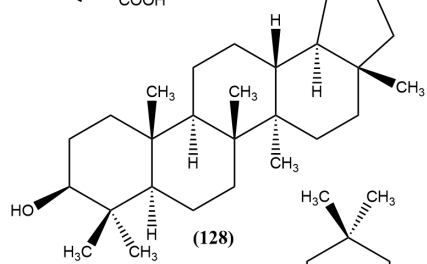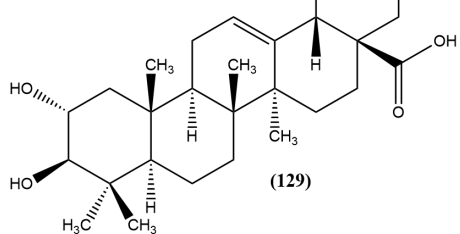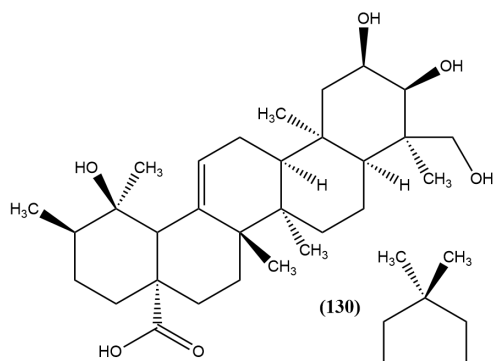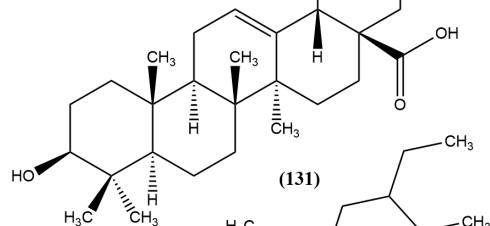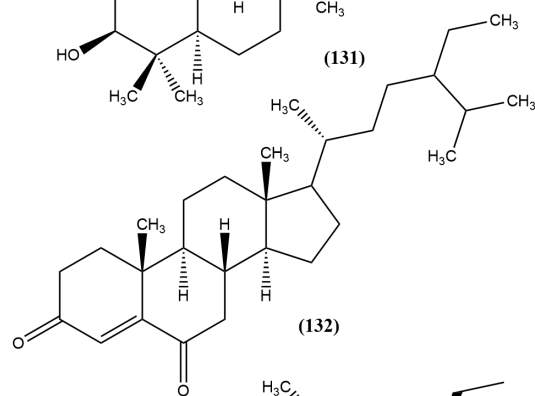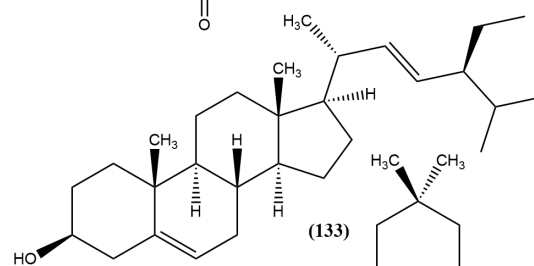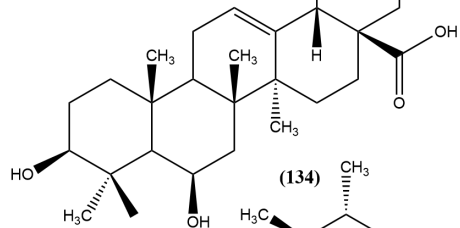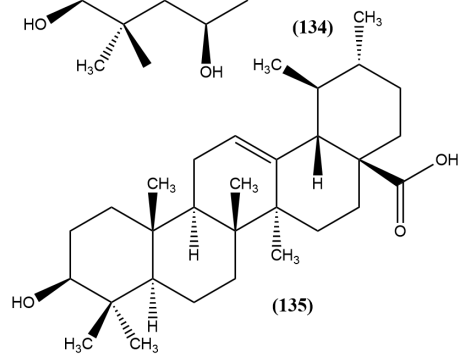

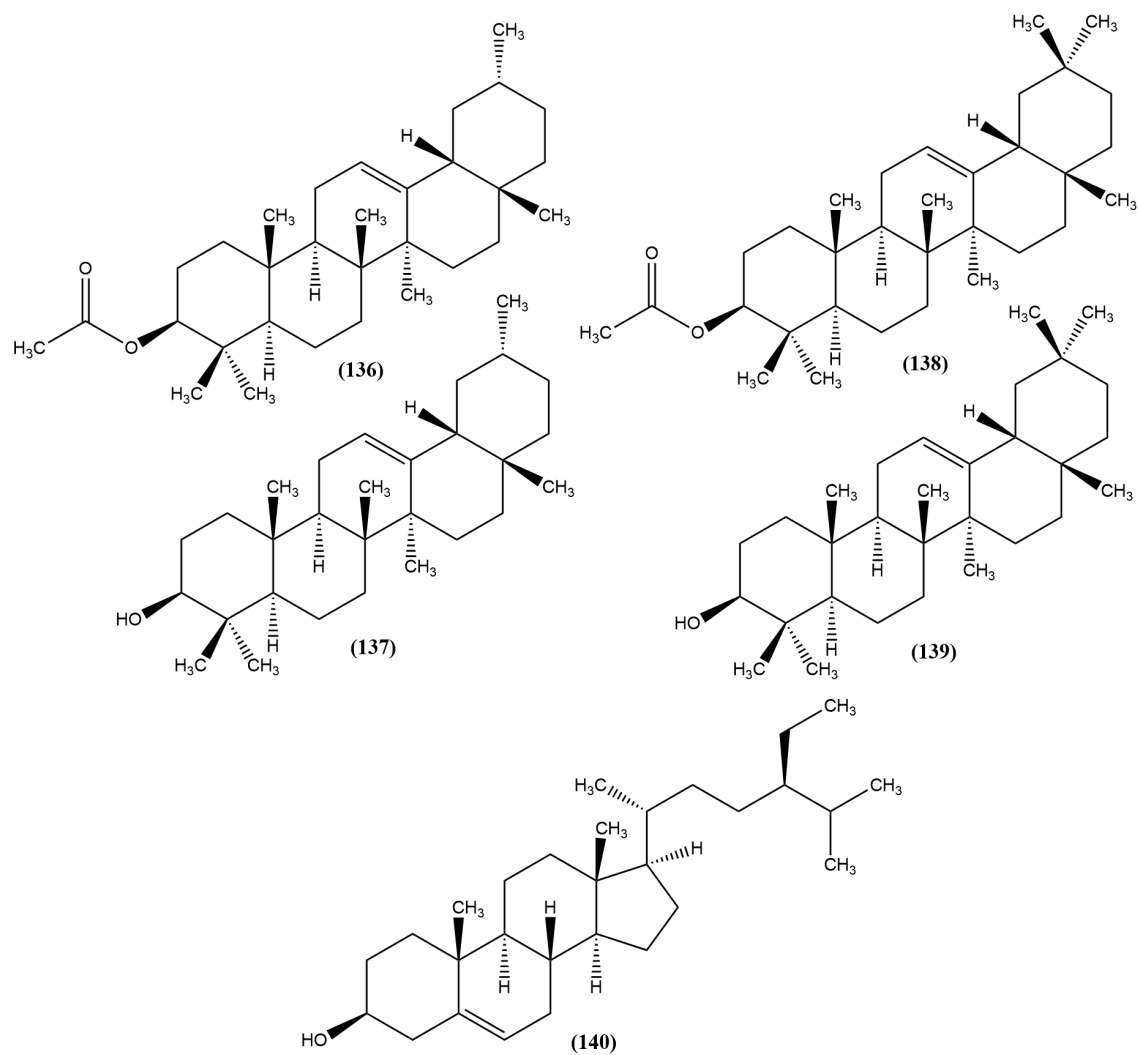

**Figure S5.** Triterpens and steroids identified in the species of the genus *Miconia* (Compounds 112-140).

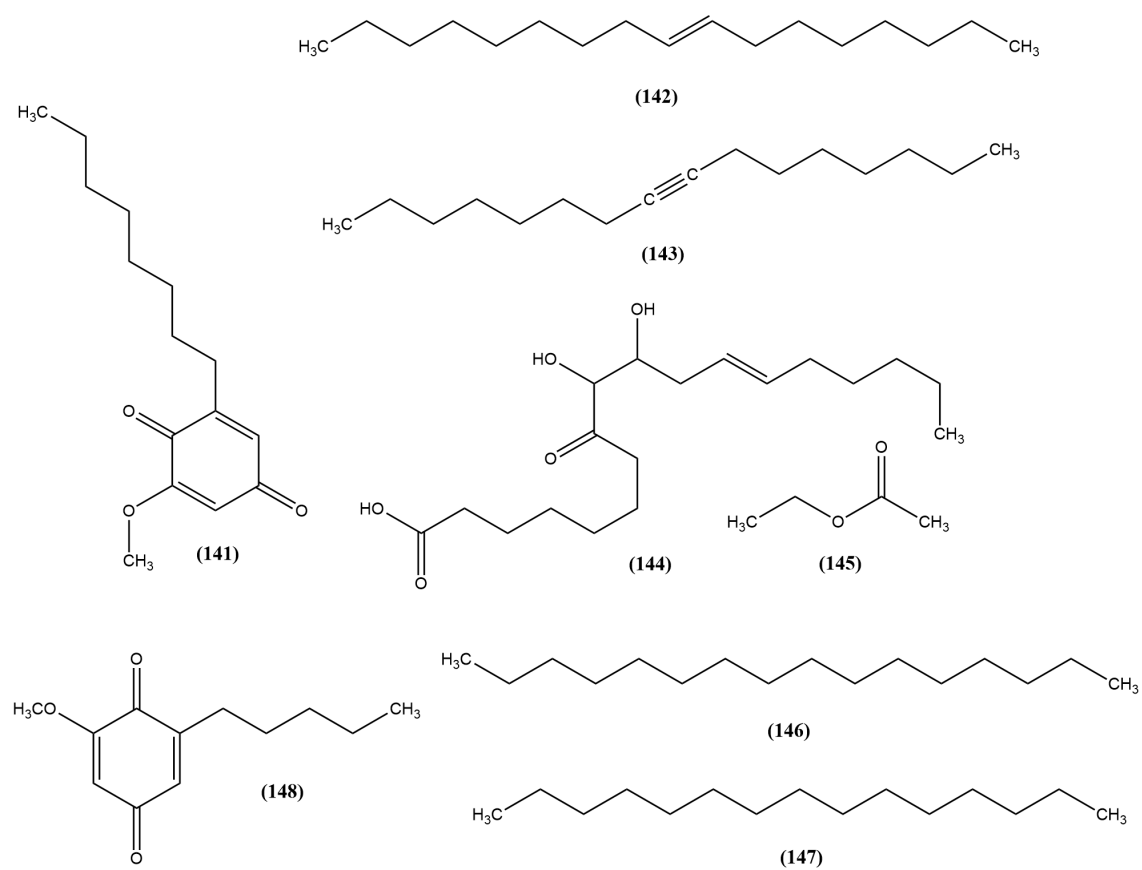

**Figure S6.** Other compounds identified in the species of the genus *Miconia* (Compounds 141-148).
